1 **Evaluation of Compatibility of 16S rRNA V3V4 and V4 Amplicon**  
2 **Libraries for Clinical Microbiome Profiling**

3

4 Po-Yu Liu (OrcID: 0000-0003-1290-0850),<sup>a</sup> Wei-Kai Wu,<sup>b,c</sup> Chieh-Chang Chen,<sup>a,d,e</sup> Suraphan  
5 Panyod,<sup>c</sup> Lee-Yan Sheen,<sup>c</sup> Ming-Shiang Wu<sup>a,d,#</sup>

6

7 <sup>a</sup>Department of Internal Medicine, National Taiwan University College of Medicine, Taipei,  
8 Taiwan

9 <sup>b</sup>Department of Internal Medicine, National Taiwan University Hospital Bei-Hu Branch, Taipei,  
10 Taiwan

11 <sup>c</sup>Institute of Food Science and Technology, National Taiwan University, Taipei, Taiwan

12 <sup>d</sup>Division of Gastroenterology and Hepatology, Department of Internal Medicine, National  
13 Taiwan University Hospital, Taipei, Taiwan

14 <sup>e</sup>Graduate Institute of Clinical Medicine, National Taiwan University College of Medicine,  
15 Taipei, Taiwan

16

17 #Address correspondence to Ming-Shiang Wu, [mingshiang@ntu.edu.tw](mailto:mingshiang@ntu.edu.tw)

18

19 **Running Title:** 16S rRNA V3V4 and V4 Amplicon Compatibility

20

21 **Word count:**

22 Abstract: 247 words

23 Main text: 4729 words

24 **ABSTRACT**

25 Sequencing of the 16S rRNA gene by Illumina next-generation sequencing is broadly used in  
26 microbiome studies. Different hypervariable regions of the 16S rRNA gene, V3V4 (amplified  
27 with primers 341F–805R) or V4 (V4O; primers 515F–806R), are selected, depending on the  
28 targeted resolution. However, in population-based clinical studies, combining V3V4 and V4 data  
29 from different studies for a meta-analysis is challenging. Reads generated by short-read (150-bp)  
30 high-throughput sequencing platforms do not fully recover the V4 region read-length. Here, we  
31 evaluated the compatibility of 16S rRNA V3V4 and V4 amplicons for microbiome profiling. We  
32 compared taxonomic compositions obtained by the analysis of V3V4 and V4 amplicons, and V4  
33 fragments trimmed from V3V4 amplicons. We also evaluated an alternative V4 region (V4N;  
34 primers 519F–798R) designed for efficient stitching with 150-bp paired-end sequencing. First,  
35 we simulated a global investigation of environmental prokaryotes *in silico*. This revealed that  
36 V4O primers recovered the highest proportion of fragments (81.7%) and most phyla, including  
37 archaea. Empirical sequencing of standard (mock) and human fecal samples revealed biased  
38 patterns of each primer that were similar to the ones determined by *in silico* simulation. Further,  
39 for human fecal microbiome profiling, the between-sample variance was greater than the  
40 systematic bias of each primer. The use of trimmed V4 fragments and single-end amplicons  
41 resulted in the same systematic bias. In conclusion, paired-end V4O sequencing yielded the most  
42 accurate data for both, simulation and mock community sequencing; the V4O amplicons were  
43 compatible with trimmed V4 sequences for microbiome profiling.

44

45 **IMPORTANCE**

46 Next-generation sequencing of the 16S rRNA gene is a commonly used approach for clinical  
47 microbiome studies. Different amplicons of the 16S rRNA hypervariable regions are used in  
48 different studies, which creates incompatible sequence features when comparing and integrating  
49 data among studies by using 16S denoising pipelines. Here we compared the type of data and  
50 coverage obtained when different 16S rRNA amplicons were analyzed. *In silico* and empirical  
51 analyses of the human fecal microbiome revealed that the V3V4 amplicons are compatible with  
52 V4 amplicons after trimming up to the same region. These observations demonstrate that  
53 reconciling the compatibility of clinical microbiome data from different studies improve not only  
54 the sample size but also the confidence of the hypothesis tested.  
55

## 56 INTRODUCTION

57 The human microbiome affects human health in numerous ways (1-7). Notably, the gut  
58 microbiome mediates host metabolic and physiological status, such as digestion, immune  
59 response, neuron transmission, and circulation (8). Clinical research of the microbiome is rapidly  
60 advancing, propelled by sequencing of the 16S rRNA gene (abbreviated “16S”) using the next-  
61 generation sequencing (NGS) technology. Although long-read sequencing technologies have  
62 matured in recent years, the well-developed analysis pipelines for massive microbiome  
63 taxonomic profiling (e.g., QIIME2) are mainly based on the Illumina sequencer systems (9).

64 Accurate evaluation of the microbiota heavily depends on the primers used (10, 11).  
65 Further, lower-level taxonomic resolution bias can arise when non-representative regions are  
66 amplified (12). The 16S V3V4 (primers 341F–805R) and V4 (primers 515F–806R)  
67 hypervariable regions are most frequently used for human microbiome profiling (6, 13). When  
68 an amplicon library is prepared using Nextera XT two-step polymerase chain reaction (PCR), the  
69 expected insert sizes from these regions are 465 bp and 291 bp, respectively. (14, 15). The V3V4  
70 and V4 amplicons are fully recovered on the Illumina MiSeq platform, which can be used to  
71 sequence up to 600 nucleotides from both ends of an amplicon [(300 bp)×2].

72 When the National Institute of Health Human Microbiome Project (HMP) started in 2008,  
73 investigations of the human microbiota using Roche/454 pyrosequencing focused on the 16S  
74 V3V5 region (primers 357F–926R) (16). However, the V3V4 region became the mainstream  
75 amplicon target in microbiota studies since Illumina released a recommended library preparation  
76 protocol for sequencing on the MiSeq platform (15). Although the outputs of both sequencing  
77 approaches were comparable (17), the Illumina platform generated much more reads than  
78 pyrosequencing. After HMP, in 2010, the Earth Microbiome Project (EMP) was initiated, as a

79 global investigation of environmental and host-associated microbiomes (18, 19). The 16S V4  
80 region (primers 515F–806R) was amplified for sequencing in the EMP projects (18), including  
81 human-associated microbiome studies (20) and the American Gut Project (21). This allowed for  
82 a more representative prokaryotic profiling since the V4 universal primer pair effectively  
83 captures both bacterial and archaeal 16S sequences. However, the EMP V4 libraries were  
84 constructed using custom sequencing primers according to Caporaso et al. (22), and generated by  
85 150-bp paired-end (PE) sequencing with additional 14 cycles for barcode tagging on MiSeq or  
86 HiSeq. The amplicon insert size of the custom V4 library is expected to be 252 bp, while the  
87 two-step PCR method generates 291 bp from the same targeted region (14). This means that the  
88 Nextera XT two-step PCR method is only suitable for platforms with an over 150-bp PE  
89 sequencing capacity (250-bp PE and 300-bp PE). Nonetheless, the V4 region is analyzed  
90 regardless of which protocol is followed. Data from different protocols are supposed to be  
91 ideally integrated amplicon sequence variants (ASVs) for meta-analysis microbiota profiling by  
92 using denoising algorithms (23) [e.g., DADA2 (24), Deblur (25), and UNOISE3 (26, 27)] in the  
93 QIIME2 pipeline (28).

94         The sequencing cost per megabase has exceeded Moore’s Law, which describes a trend  
95 in doubling of computing power that conceives the improvement of DNA sequencing capacity  
96 yearly and even over the exponential trend (29). The Illumina sequencing platforms generate  
97 between several tens to hundreds of millions of reads, enabling deep profiling of a large number  
98 of samples during a single PE run at a fraction of the cost of a study. The output of more than  
99 100,000 reads per sample is suggested and sufficient for microbiota investigations (15). Reduced  
100 sequencing runs are preferred in large sample-size studies, especially clinical cohort studies, to  
101 avoid batch effects. Higher throughput sequencers, such as NextSeq and HiSeq, which are

102 common in academic core laboratories, generate reads with a low batch effect and at a low cost  
103 per sample with a single run (30). However, the confidence for stitching both ends to recover the  
104 full V4 region after quality trimming of thus generated PE sequences [(150 bp)×2, the maximum  
105 read length of NextSeq] is low. Hence, it is difficult for the higher throughput platforms to meet  
106 the demands for cost–benefit and data yields.

107 In response to the changes of amplicon sequencing methods in the clinical gut microbiota  
108 research and considering the cost–benefit of sequencing, we here compared several pairs of  
109 sequencing and analysis approaches. We first conducted an *in silico* PCR simulation of a global  
110 investigation of environmental prokaryotes by capturing the 16S V3V4 and V4 regions, as well  
111 as the V4 fragments trimmed from V3V4 from the SILVA 132 ribosomal RNA NR 99 database  
112 (DB). We tested primer and analysis bias by analyzing a mock microbial community. We then  
113 sequenced human fecal samples and analyzed the data using the QIIME2 pipeline with the  
114 DADA2 plugin, which is currently the most accurate sample inference method (denoising). We  
115 then evaluated the compatibility (including the taxonomic abundance consistency and coverage)  
116 of the amplicons of different 16S hypervariable regions. The analysis revealed primer- and  
117 analysis method-associated bias. Based on the findings, we propose optimized analytical options  
118 for clinical population-based and meta-analysis studies.

119

## 120 **RESULTS**

121 **Cost evaluation of 16S amplicon sequencing using the Illumina MiSeq and NextSeq**  
122 **platforms.** NGS sequencers are versatile platforms for sequencing-based studies. The cost–  
123 benefit ratio (output quantity and quality) of sequencing has to be considered when choosing a  
124 suitable platform. Focusing on the 16S amplicon sequencing, we compared the cost effectiveness

125 of the Illumina mid to mid–high throughput platforms (MiSeq and NextSeq platforms), which  
126 the majority of academic core laboratories are commonly equipped with (Table 1).

127       The maximal flow cell configurations of MiSeq and NextSeq are 600 (300-bp PE) and  
128 300 (150-bp PE) cycles, respectively. Based on the Illumina Nextera XT library preparation  
129 method for 16S amplicons, the V3V4 and V4 regions are fully recovered using the MiSeq 600-  
130 cycle reagent kits; on the other hand, only the V4 region can be in “theory” recovered using the  
131 NextSeq 300-cycle reagent kits. Fixing the output at 100K PE reads per sample, the MiSeq can  
132 process 175 samples per run (96 samples per run as the regular configuration), using the default  
133 library preparation method (Nextera XT). The mid-output and high-output flow cells of the  
134 NextSeq can process up to 384 samples per run (all index pairs), accounting for 39.4% and  
135 12.8% reads of a single run, respectively. The 16S amplicon sequencing costs in US dollars are  
136 \$15.2 per 100K reads per sample for the MiSeq, decreasing to \$3.4 and \$2.8 for the NextSeq  
137 mid-output and high-output platforms, accordingly.

138       Since the Illumina NGS base quality decreases toward the 3'-end over the read (Fig. 1A),  
139 the overlapping area of the PE sequences should be sufficiently long to allow the assembly by  
140 high-quality base pairs (Fig. 1B). However, when the V4 amplicon sequencing is performed via  
141 short read-lengths (e.g., 150-bp PE), gaps exist between the two amplicon ends after quality  
142 trimming (Fig. 1C). Caporaso et al. (29) modified the V4 library preparation method to make it  
143 suitable for use with 150-bp PE sequencing. The modified method generates 252-bp amplicons  
144 instead of 291-bp amplicons obtained with the Nextera two-step PCR approach. However,  
145 although the modified method increases both, the V4 amplicon assembly efficacy and  
146 sequencing capacity (up to 975 and 2168 samples per run on the NextSeq mid-output and high-  
147 output platforms), it requires manual alteration of the sequencing software configuration. The

148 above comparisons revealed that it is necessary to optimize sequencing configurations (i.e.,  
149 library construction by amplifying suitable hypervariable region and sequencing with long  
150 enough configuration) for improving the cost-benefit of 16S amplicon sequencing. We, therefore,  
151 further proceeded to test if the shorter (V4) amplicons harbor equivalent or better taxonomic  
152 profiling capacities compared to the longer (V3V4) amplicons.

153 **Comparison of taxonomic profiling capacities of the 16S V3V4 and V4 regions by an**  
154 ***in silico* PCR simulation.** To evaluate the primer efficacies of 16S V3V4 (primers 341F–805R)  
155 and V4 primer pairs (including V4 original, V4O, primers 515F–806R; alternative V4, V4N,  
156 primers 519F–798R; tV4O, V4O region trimmed from V3V4 fragment; and tV4N, V4N region  
157 trimmed from V3V4 fragment), we simulated PCR capture of the targeted fragments from the  
158 DB [SILVA 16S gene database (NR 132 99%)](31, 32). The simulation encompassed an  
159 investigation of the primer-dependency of detected bacterial and archaeal profiles because the *in*  
160 *silico* PCR captured all targeted sequences from the global environment.

161 The DB contains 369,953 representative 16S sequences (Table 2). Our targeted  
162 approaches extracted 59.2% to 81.7% of sequences from the DB. Although the V3V4 primers  
163 captured the longest fragments, they extracted 77.3% of all DB sequences, while the V4O  
164 primers extracted 81.7% of all sequences. The V4N-captured sequences covered most of the  
165 V4O region but were shorter by approximately 11 bp. This reduced the capture rate of V4N to  
166 66.2%. The tV4 primers recovered 72.5% (tV4O) and 59.2% (tV4N) of sequences from the DB,  
167 and 93.8% (tV4O) and 76.5% (tV4N) of the V3V4 sequences.

168 Based on the assigned taxonomy analysis, all primers captured similar proportions of the  
169 major phyla in *in silico* PCR (Fig. 2A). However, the overall differences from the DB  
170 composition ranged from 6.44% to 36.69% of the phyla proportions. The V4O resulted in the



171 least differences (6.44%) from the DB, followed by V3V4 (15.23%) and V4N (30.0%). The  
172 trimmed V4 approaches led to datasets that differed by 16.9% (tV4O) and 36.69% (tV4N) from  
173 the DB. Both V4O and V4N approaches captured the maximum archaea (5.26% and 3.40%,  
174 respectively; Table S1), while the V3V4 approach captured the fewest archaea (0.02%). The two  
175 trimmed V4 approaches, designed based on V3V4, did not efficiently capture the archaea (0.02%  
176 for tV4O and 0.005% for tV4N).

177 We then compared the accuracy of the classification at each taxonomic level by the  
178 different primer approaches (Fig. 2B). Over 90% of V4O-generated sequences were assigned  
179 correct taxonomy, followed by the V3V4 and tV4O sequences (approximately 80% accuracy at  
180 each level). However, at most 70% and 63% of the V4N and tV4N sequences, respectively, were  
181 assigned the correct taxonomy (summarized in Table 3). This indicates that the V4O primer  
182 would yield the best taxonomic profiles in a global microbial investigation.

183 **Mock community profiling by using seven different 16S amplicon analytic**  
184 **approaches.** To empirically evaluate the compatibility of V3V4 and V4 primers, we sequenced  
185 and analyzed a mock microbial community. The mock community represented eight species of  
186 bacteria and two species of yeasts (see Materials and Methods) and is an artificial synthesized  
187 microbial community that serves as a quantitative standard. We used seven analytical approaches,  
188 all in conjunction with the QIIME2 DADA2 denoising pipeline (9, 24)(Fig. 3), i.e., we analyzed  
189 PE V3V4 amplicons (V3V4), PE V4O amplicons (V4O), PE V4N amplicons (V4N), single-end  
190 V4O amplicons (V4OSE), single-end V4N amplicons (V4NSE), and V4 amplicons trimmed  
191 from V3V4 (trimmed V4O, tV4O; and trimmed V4N, tV4N). We also sequenced human fecal  
192 samples from 10 volunteers using the same protocols utilized to evaluate the primer  
193 compatibilities in real targeted samples.

194 First, we compared the data for mock community samples (simple sample composition)  
195 with human fecal samples (complex sample composition) using the seven analytic approaches  
196 (Fig. 3A). The beta-diversity (measured by Bray–Curtis dissimilarity) ordination plot revealed  
197 high homogeneity in mock community quantification of the seven approaches. The Bray–Curtis  
198 dissimilarity is a quantitative measurement. Accordingly, a zoomed-in view of the beta-diversity  
199 ordination for the mock community revealed that the PCR conditions (primers used) reflected the  
200 community quantitative composition (Fig. 3B). Specifically, the trimmed V4 data points were  
201 close to the V3V4 data point; the PE and SE V4O data points were clustered together; and the PE  
202 and SE V4N data points were proximal on the first plot axis.

203 The relative taxonomic abundances in the theoretical sample, as determined by the seven  
204 analytical approaches, were not significantly different (G-test; mean of  $G=1.31$ ,  $P=0.99$ ; Fig. 3C).  
205 The rates of misclassification (unassigned or assigned to yeasts) were less than 1% in all  
206 analyses. The differences in the determined relative abundance and the theoretical composition  
207 ranged from 8.14% (V4O) to 15.22% (V4N). Sample composition determined by the V3V4  
208 approach (and its derived V4 approaches) differed by approximately 10% from the theoretical  
209 composition. This indicates that the different 16S regions and analytic approaches for profiling a  
210 simple composition microbiota, such as a synthesized mock community, are able to present  
211 similar quantitative and qualitative results.

212 **Determination of sample heterogeneity and variation of taxa composition after 16S**  
213 **amplification with different primers.** We next analyzed human fecal samples to evaluate the  
214 complementarity of different 16S amplification analytical approaches. The seven analytical  
215 approaches used were the same as those for the mock community analysis. We examined the  
216 beta diversity, as determined by the seven approaches (Fig. 4). The beta-diversity profiles for

217 fecal microbiota data points for the seven approaches reflected the 10 individual sample sources  
218 (Fig. 4A). We tested the sample and analytical approach heterogeneity by the analysis of  
219 similarities (ANOSIM). The between-sample variance was greater than within-sample variance  
220 ( $R=0.987$ ,  $P=0.001$ ; Fig. 4A and Fig. 4B); on the other hand, the between-analytical approach  
221 variance was not significantly greater than the within-analytical approach variance ( $R=0.016$ ,  
222  $P=0.22$ ; Fig. 4C and Fig. 4D). In other words, the determined sample variation was relatively  
223 constant, regardless of the primers or analytical approaches used.

224 We next analyzed three alpha-diversity indices (namely, richness, Shannon entropy, and  
225 Simpson index of diversity), as determined by using the seven analytical approaches (Fig. S1).  
226 The three indices were not statistically significantly different when the different approaches were  
227 used ( $P>0.05$ ). However, the differences in the richness index were marginally significant  
228 ( $P=0.08$ ) for the seven approaches; this trend was attributed to reduced taxon numbers in samples  
229 analyzed using the trimmed V4O and trimmed V4N approaches (Fig. S1A).

230 **Consistency of taxonomic abundances determined by different 16S amplicon**  
231 **analytical approaches.** PCR artifacts (over-amplified amplicons and chimeras) interfere with  
232 taxonomic quantification and taxonomic structure profiling of microbiome samples. The artifacts  
233 are sequences that are amplified in a biased manner during PCR. No universal primer exists for a  
234 fully unbiased amplification. In the current study, we used the DADA2 denoising pipeline to  
235 reduce the confounding effect of PCR artifacts. We profiled the higher-level taxonomy  
236 compositions (the relative phylum abundance) by using stacked barplots (Fig. 5A). The  
237 proportion of each phylum was different for different analytical approach used, but the difference  
238 was not statistically significant (G-test; mean of  $G=0.81$ ,  $P=1$ ). However, the V4N-PE analytical

239 approach under-detected the phylum *Verrucomicrobia* (relative abundance 0.02% vs. 1% of  
240 other approaches).

241 Because no theoretical reference exists for the human fecal microbiota composition, we  
242 used the V3V4 approach (the longest sequence region; Fig. 5B) and the V4O approach (the most  
243 accurate method based on *in silico* simulation and mock community experiments; Fig. 5C) as  
244 benchmarks to evaluate the classification accuracy. The taxonomy data obtained by V3V4-  
245 derived analyses (trimmed V4O and trimmed V4N) were the closest to those of the V3V4  
246 approach above the genus level (Fig. 5B). Compared with the V3V4 data, the accuracy of V4O  
247 and V4N (PE and SE) methods above the genus level was 78.9% to 91.3%. On the other hand,  
248 compared with the V4O data, the taxonomy determined by the V4OSE method was the closest to  
249 that of the V4O (PE) method (Fig. 5C). The other methods reached an 83.1% to 93.0% average  
250 relative accuracy above the genus level. The rank abundance analysis at the family (Fig. S2A)  
251 and genus levels (Fig. S2B) revealed that the taxon abundance was consistent with the V4O-  
252 based classification accuracy.

253 We then performed pairwise analysis of taxonomic abundance correlations between the  
254 seven analytical approaches (Fig. 6). We plotted the abundance of each taxonomy-assigned ASV  
255 using pairwise-correlation scatter plots (Fig. 6, lower left panels) and noted the abundance  
256 correlation coefficients (Fig. 6, upper right panels). The correlation coefficients between the  
257 V3V4 data and other methods ranged from 0.54 to 0.69. The correlation coefficients between the  
258 V4 method data, regardless of whether these were PE, SE, or trimmed methods, and the V4O and  
259 V4N data were high (0.92 to 0.94). In addition, for the V4 PE data, we observed the best  
260 correlation between the corresponding trimmed V4 methods (0.99 for V4O and tV4O; and 0.98  
261 for V4N and tV4N) (summarized in Table 3). A high consistency among V4 approaches

262 presented by integrating both taxonomic assignment and quantification, and the V3V4 amplicons  
263 would be compatible with V4 by trimming up to the same hypervariable region.

264

## 265 **DISCUSSION**

266 The increasing popularity and advances in sequencing technology prompt human and  
267 clinical microbiome studies. However, the types of sequencing technology and reagents used  
268 limit meaningful comparisons of the obtained data. Here, we compared the most popular  
269 microbiome sequencing approaches that rely on the analysis of 16S amplicons (i.e., amplifying  
270 different hypervariable regions and coupling with DADA2 sequence variants' denoising process).  
271 We evaluated the accuracy and consistency of 16S amplicons, which are captured by V3V4 and  
272 V4 regions. Our findings showed that V4O (515F-806R) primer yielded the most consistent,  
273 complementary, and accurate taxonomic profile. Additionally, we implemented an integrated  
274 approach for the V3V4 and V4 amplicons from different datasets by trimming V3V4 sequences  
275 up to the V4 region.

276 The NGS technology and HMP (HMP 1 and iHMP) generate massive sequencing data,  
277 promoting clinical microbiome association studies (33). These studies reveal numerous  
278 previously unknown host–microbe interactions that underlie various health issues, especially  
279 non-communicable diseases, with novel etiology linkages (3-7). For a population-based cohort  
280 study in the clinical microbiome research, data throughput and quality, the cost–benefit aspect,  
281 and validity of the analytical pipeline should all be considered. The 16S V3V4 and V4  
282 hypervariable regions are widely selected for human microbiota profiling, but the fragments  
283 amplified from different regions should be coupled with suitable sequencing conditions.  
284 Accordingly, we here evaluated the compatibility of different amplicon libraries by *in silico* and

285 empirical approaches, coupled with a denoising algorithm to detect ASVs. The analysis  
286 demonstrated that the current widely used amplicon primers capture over 80% of the taxonomic  
287 information. The amplicon sequence length was a critical factor for taxonomic profiling as  
288 longer sequences contain more genetic information than shorter sequences (11). The primers  
289 were another critical factor, as the amplicons are more representative of the sample complexity  
290 when generated by more universal (conserved) primers. For example, while the V3V4 and V4O  
291 approaches share nearly identical reverse primers, the V3V4 library was characterized by a  
292 higher ASV richness index (ASV numbers; Fig. S1A) but contained less taxonomic information  
293 than the V4O library (the archaeal phyla were almost absent in the V3V4 library; Fig. 2A and  
294 Table 3).

295         The taxonomic assignment accuracy is crucial for the subsequent study design, such as  
296 strain isolation, identification, and clinical or commercial applications (12). The *in silico* PCR  
297 analysis performed herein demonstrated that the V4O taxonomy assignment is more accurate  
298 than the V3V4-based assignments. However, even though the V4N-captured sequences  
299 overlapped with most regions captured by the V4O method, the taxonomic accuracy (at most  
300 70% accuracy at phylum level) was much lower than that of either V3V4 or V4O method. In  
301 practice, the tV4O approach (V4O trimmed from V3V4) was compatible for integrating V3V4-  
302 generated data with V4O-generated data (Fig. 6) when testing the human gut microbiome  
303 samples, which contain fewer archaea than environmental samples. Since short-read amplicon  
304 sequencing only extracts partial information for the 1.5-kb 16S rRNA gene, the taxonomic  
305 identification is at most limited at approximately 80% accuracy at the genus level by V3V4  
306 primer amplification and at the species level by V4O primer amplification.

307           The V4 amplicon sequencing meets economic benefits for microbiome studies. Amplicon  
308 sequencing in many studies, not only environmental ecological studies but also human-  
309 associated studies, focuses on the V4 region and relies on the EMP protocol. However, the  
310 library construction methods are restricted by the maximum read length of a sequencer (30). In  
311 other words, the amplified V4 amplicon fragment size (PCR product without the adapter-linking  
312 sequences) is expected to be approximately 291 bp if the library is constructed by following the  
313 Nextera XT two-step dual index PCR protocol. The two-step dual index PCR method was  
314 officially designed for 16S V3V4 library construction, coupled with MiSeq 600-cycle (300 PE)  
315 sequencing by Illumina (15). Although the two-step dual index PCR is not exclusive to MiSeq  
316 and V3V4 amplicons (34), its sequencing outputs (i.e., the read length and PE overlap) should be  
317 precisely calculated based on the quality score distributions from the 5'-end to the 3'-end of the  
318 read (35). For example, the PE reads overlap by less than 10 bp when a V4 amplicon library is  
319 constructed by using Nextera XT kit and sequenced as 150 PE. Most V4 150 PE reads do not  
320 pass the quality filtering and cannot be used to assemble both ends. In addition, the DADA2  
321 algorithm only accepts PE reads with a more than 20-bp overlap as default (24).

322           Caporaso et al. (36) developed customized sequencing primers based on HiSeq 150 PE.  
323 The ensuing customized sequencing procedures entailed modification of the library construction  
324 methods (forward primers were directly linked to barcode sequences and an adapter), the  
325 sequencing program (using the TruSeq workflow and ignoring an error message from the  
326 sequencer system), and increasing the run by additional 14 sequencing cycles. Consequently, the  
327 method not only solved the unassembled read problem (yielding 253-bp amplicon fragments) but  
328 also lowered the sequencing cost per sample (Table 1). However, even though in some studies,  
329 the early stages of sequencing do not follow the EMP or Caporaso protocols, the unassembled

330 reads can be analyzed by using a single-end pipeline. We here demonstrated that the single-end  
331 pipeline was comparable with the PE pipeline, with more than 90% confidence in the taxonomy  
332 assignment but a slightly inferior quantification (Pearson's correlation coefficient 0.75) (Table 3).

333 The ASV denoising methods (23) (e.g., DADA2(24), Deblur(25), and UNOISE3(27)) are  
334 replacing the traditional operational taxonomic unit clustering methods for choosing  
335 representative amplicon sequences. These denoising methods detect real biological sequence  
336 features missed by clustering, and denoised features are specific and reproducible (23). Therefore,  
337 we suggest trimming the V3V4 and V4 sequences to the same region to acquire the same  
338 representative ASVs when combining different libraries. Although the V3V4 approach under-  
339 detected the archaea, the analysis of trimmed V4 amplicons recovered the qualitative and  
340 quantitative aspects of the human gut microbiome with over 90% confidence (Table 3 and Fig. 6).

341 In conclusion, in the current study, we evaluated the compatibility of 16S V3V4 and V4  
342 amplicons typically analyzed in clinical microbiome profiling studies by using a sequence  
343 variant-denoising pipeline. Our findings suggest that: (1) the analysis of the PE V4O amplicon  
344 (amplified using primers 515F–806R) results in the most accurate taxonomic assignment; (2) the  
345 V3V4 amplicon analysis is compatible with the V4 amplicon analysis after trimming to the same  
346 region; and (3) while mid-high throughput sequencers reduce the cost of sequencing per sample,  
347 only a customized V4 library is suitable for stitching PE reads for subsequent analyses (36). The  
348 findings are empirical and analytical suggestions for cost-effective population-based or meta-  
349 analysis clinical microbiome studies.

350

351 **MATERIALS AND METHODS**



352           **Ethics statement and sample collection.** The studies involving human fecal sample  
353 collection and informed consent from human participants were approved by the Institutional  
354 Review Board of National Taiwan University Hospital, Taipei, Taiwan (201606045RINB). Fecal  
355 samples from 10 healthy volunteers were collected during February 2017 at the National Taiwan  
356 University, as described by Wu et al. (37).

357           **Primer selection and alternative V4 primer design.** Two sets of 16S amplicon primers,  
358 which targeted the V3V4 (primers 341F–805R) and V4 (primers 515F–806R; V4O) regions,  
359 were selected from the Illumina-recommend (38) and EMP protocols (18), respectively. An  
360 alternative pair of V4 region-specific primers (V4N) consisted of modified primers of EMP V4  
361 and Ghyselinck et al. (39): 519F, 5'-CAGCMGCCGCGGTAAT-3', and 798R, 5'-  
362 GGGTWTCTAATCCKGTT-3'. The expected PCR product length was 279 bp. The V4N  
363 primers were synthesized with overhang adapters for index attachment and Illumina sequencing  
364 adapters(15). The coverage rate of each primer pair was evaluated by using *in silico* PCR  
365 simulation (see below).

366           ***In silico* PCR simulation.** The read and taxonomy coverage rates of the SILVA 16S  
367 gene database (NR 132 99%) (31, 32) were evaluated by *in silico* PCR. The simulation was  
368 conducted by extracting the expected PCR fragments generated by amplification using the V3V4,  
369 V4O, and V4N primers. The *in silico* PCR pipeline was set-up using a UNIX shell script, as  
370 follows: (1) create a list of degenerate primer pairs, and link the forward primer to the reverse  
371 primer with “.\*” from the 5'-end to the 3'-end (e.g.,  
372 CCTACGGGAGGCAGCAG.\*GGATTAGATACCCCAGTAGTC); (2) count the fragments  
373 extracted from the database fasta file by using UNIX command “*grep*” with the parameter *-c*; (3)  
374 obtain the targeted sequence fragments using the parameter *-o*; (4) extract the sequence ID using

375 the parameter *-B 1*; (5) count the length of *in silico* PCR products using the *awk '{ print length }'*  
376 UNIX command.

377 **Sequencing library preparation for mock community and human fecal microbiomes.**

378 *DNA extraction.* Genomic DNA from a mock community standard (ZymoBIOMICS Microbial  
379 Community Standard, catalog no. D6300, ZYMO RESEARCH, CA, USA) and from stool  
380 samples from 10 volunteers was extracted using QIAamp<sup>®</sup> PowerFecal<sup>®</sup> DNA Kit (QIAGEN,  
381 catalog no. 12830–50; Hilden, Germany). The genomic DNA was stored at  $-20^{\circ}\text{C}$  until PCR  
382 amplification and amplicon sequencing.

383 *Amplification and NGS sequencing.* Two-step PCR was performed, following the  
384 Illumina protocol for 16S metagenomic sequencing library preparation. PCR was first performed  
385 to capture the 16S V3V4 (primers 341F–805R) and V4 hypervariable regions (primers 515F–  
386 806R and 519F–798R). Three libraries were then constructed by index PCR using the Nextera  
387 XT duel-Index PCR primers (15). The pooled libraries were PE-sequenced in the same run using  
388 the Illumina MiSeq reagent kit version 3 (San Diego, CA, USA) for 600 cycles at the Medical  
389 Microbiota Center of the First Core Laboratory, National Taiwan University College of  
390 Medicine.

391 **Bioinformatic analysis for microbial taxonomic profiling.** *Sequence denoising using*

392 *DADA2 and the QIIME 2 pipeline.* The sequences were processed by using QIIME 2 pipeline  
393 (version 2019.10) (9). The primer sequences were trimmed from the raw reads in the three  
394 libraries by using the *cutadapt* plugin. The trimmed single-end or PE sequences were  
395 subsequently denoised using the *DADA2* plugin in QIIME2. To obtain qualified ASVs, the reads  
396 were truncated from the 3'-end based on the quality score distribution to the following read  
397 length: (1) V3V4-forward, 270 bp, and V3V4-reverse, 210 bp; (2) V4O-forward, 131 bp, and

398 V4O-reverse, 130 bp; and (3) V4N-forward, 134 bp, and V4N-reverse, 133 bp. In addition,  
399 theV3V4 reads were trimmed to the V4O and V4N read-length for further comparisons. High-  
400 confidence ASVs were then obtained by denoising, with quality filtering and chimera removal.  
401 The taxonomy was assigned using a naïve Bayes classifier trained on the SILVA 132 99% full-  
402 length 16S rRNA gene sequence database (31, 32).

403 *Microbial biodiversity and statistical analyses.* All statistical analyses were conducted  
404 with R version 3.6.1(40). Microbial community analyses were performed using the *vegan* R  
405 package (41). Alpha diversity indices, including the Shannon index and Simpson index, were  
406 determined by using the “diversity” function; the Richness index was calculated by using the  
407 “specnumber” function. The beta diversity was determined based on the Bray–Curtis  
408 dissimilarity and visualized by principal coordinates analysis. ANOSIM was used to test the  
409 heterogeneity among individuals, controlling for the different primers. All univariate analyses  
410 were conducted by the Kruskal–Wallis test with  $\alpha=0.05$  cut-off for significance and Dunn’s test  
411 for post-hoc comparisons. Multiple-testing P-values were adjusted based on the false discovery  
412 rate by using the “p.adjust” function in R. The likelihood-ratio test (G-test with  $\alpha=0.05$  cut-off  
413 for significance) for the abundance profiles was performed by using the *RVAideMemoire* R  
414 package.

415 **Data availability.** Sequences generated in the course of the current study have been  
416 deposited in the Sequence Read Archive (SRA) database under the accession number  
417 PRJNA643648.

418

419 **ACKNOWLEDGMENTS**

420 We thank the research participants and research assistants from the Institute of Food  
421 Science and Technology, National Taiwan University, Taipei, Taiwan (Guan-Ling Ou) and  
422 National Taiwan University College of Medicine, Taipei, Taiwan (Yu-Tang Yang and Fang-Wei  
423 Kuo). We would also like to acknowledge the sequencing service provided by the Medical  
424 Microbiota Center of the First Core Laboratory, National Taiwan University College of  
425 Medicine, the computational resource support by Prof. Alex Hon-Tsen Yu at the Department of  
426 Life Science, National Taiwan University, and technical consulting by An-Chi Cheng at the  
427 University of Florida, Gainesville, FL, USA.

428 We declare that we have no competing interests.

429 P.Y.L. and W.K.W. conceived and planned the project. W.K.W., C.C.C., and S.P. were  
430 involved in sample collection, processing, and storage, and supervised the experiments. P.Y.L.  
431 conducted all bioinformatic and statistical analyses. P.Y.L. and W.K.W. were involved in data  
432 interpretation and manuscript planning. P.Y.L. drafted the manuscript. L.Y.S. and M.S.W.  
433 supervised the study. All authors approved submission of the final version.

434

## 435 REFERENCES

- 436 1. Ley RE, Turnbaugh PJ, Klein S, Gordon JI. 2006. Microbial ecology: human gut  
437 microbes associated with obesity. *Nature* 444:1022-3.
- 438 2. Turnbaugh PJ, Ley RE, Mahowald MA, Magrini V, Mardis ER, Gordon JI. 2006. An  
439 obesity-associated gut microbiome with increased capacity for energy harvest. *Nature*  
440 444:1027-31.
- 441 3. Zhu W, Gregory JC, Org E, Buffa JA, Gupta N, Wang Z, Li L, Fu X, Wu Y, Mehrabian  
442 M, Sartor RB, McIntyre TM, Silverstein RL, Tang WHW, DiDonato JA, Brown JM,  
443 Lusic AJ, Hazen SL. 2016. Gut Microbial Metabolite TMAO Enhances Platelet  
444 Hyperreactivity and Thrombosis Risk. *Cell* 165:111-124.
- 445 4. Sampson TR, Debelius JW, Thron T, Janssen S, Shastri GG, Ilhan ZE, Challis C,  
446 Schretter CE, Rocha S, Gradinaru V, Chesselet MF, Keshavarzian A, Shannon KM,  
447 Krajmalnik-Brown R, Wittung-Stafshede P, Knight R, Mazmanian SK. 2016. Gut  
448 Microbiota Regulate Motor Deficits and Neuroinflammation in a Model of Parkinson's  
449 Disease. *Cell* 167:1469-1480 e12.

- 450 5. Brennan CA, Garrett WS. 2016. Gut Microbiota, Inflammation, and Colorectal Cancer.  
451 *Annu Rev Microbiol* 70:395-411.
- 452 6. Lloyd-Price J, Arze C, Ananthakrishnan AN, Schirmer M, Avila-Pacheco J, Poon TW,  
453 Andrews E, Ajami NJ, Bonham KS, Brislawn CJ, Casero D, Courtney H, Gonzalez A,  
454 Graeber TG, Hall AB, Lake K, Landers CJ, Mallick H, Plichta DR, Prasad M, Rahnavard  
455 G, Sauk J, Shungin D, Vazquez-Baeza Y, White RA, 3rd, Investigators I, Braun J,  
456 Denson LA, Jansson JK, Knight R, Kugathasan S, McGovern DPB, Petrosino JF,  
457 Stappenbeck TS, Winter HS, Clish CB, Franzosa EA, Vlamakis H, Xavier RJ,  
458 Huttenhower C. 2019. Multi-omics of the gut microbial ecosystem in inflammatory  
459 bowel diseases. *Nature* 569:655-662.
- 460 7. Hoyles L, Fernandez-Real JM, Federici M, Serino M, Abbott J, Charpentier J, Heymes C,  
461 Luque JL, Anthony E, Barton RH, Chilloux J, Myridakis A, Martinez-Gili L, Moreno-  
462 Navarrete JM, Benhamed F, Azalbert V, Blasco-Baque V, Puig J, Xifra G, Ricart W,  
463 Tomlinson C, Woodbridge M, Cardellini M, Davato F, Cardolini I, Porzio O, Gentileschi  
464 P, Lopez F, Fougelle F, Butcher SA, Holmes E, Nicholson JK, Postic C, Burcelin R,  
465 Dumas ME. 2018. Molecular phenomics and metagenomics of hepatic steatosis in non-  
466 diabetic obese women. *Nat Med* 24:1070-1080.
- 467 8. McFall-Ngai M, Hadfield MG, Bosch TC, Carey HV, Domazet-Loso T, Douglas AE,  
468 Dubilier N, Eberl G, Fukami T, Gilbert SF, Hentschel U, King N, Kjelleberg S, Knoll AH,  
469 Kremer N, Mazmanian SK, Metcalf JL, Neelson K, Pierce NE, Rawls JF, Reid A, Ruby  
470 EG, Rumpho M, Sanders JG, Tautz D, Wernegreen JJ. 2013. Animals in a bacterial world,  
471 a new imperative for the life sciences. *Proc Natl Acad Sci U S A* 110:3229-36.
- 472 9. Bolyen E, Rideout JR, Dillon MR, Bokulich NA, Abnet CC, Al-Ghalith GA, Alexander  
473 H, Alm EJ, Arumugam M, Asnicar F, Bai Y, Bisanz JE, Bittinger K, Brejnrod A,  
474 Brislawn CJ, Brown CT, Callahan BJ, Caraballo-Rodriguez AM, Chase J, Cope EK, Da  
475 Silva R, Diener C, Dorrestein PC, Douglas GM, Durall DM, Duvallet C, Edwardson CF,  
476 Ernst M, Estaki M, Fouquier J, Gauglitz JM, Gibbons SM, Gibson DL, Gonzalez A,  
477 Gorlick K, Guo J, Hillmann B, Holmes S, Holste H, Huttenhower C, Huttley GA, Janssen  
478 S, Jarmusch AK, Jiang L, Kaehler BD, Kang KB, Keefe CR, Keim P, Kelley ST, Knights  
479 D, et al. 2019. Reproducible, interactive, scalable and extensible microbiome data science  
480 using QIIME 2. *Nat Biotechnol* 37:852-857.
- 481 10. Comeau AM, Douglas GM, Langille MG. 2017. Microbiome Helper: a Custom and  
482 Streamlined Workflow for Microbiome Research. *mSystems* 2.
- 483 11. Johnson JS, Spakowicz DJ, Hong BY, Petersen LM, Demkowicz P, Chen L, Leopold SR,  
484 Hanson BM, Agresta HO, Gerstein M, Sodergren E, Weinstock GM. 2019. Evaluation of  
485 16S rRNA gene sequencing for species and strain-level microbiome analysis. *Nat*  
486 *Commun* 10:5029.
- 487 12. Bokulich NA, Kaehler BD, Rideout JR, Dillon M, Bolyen E, Knight R, Huttley GA,  
488 Gregory Caporaso J. 2018. Optimizing taxonomic classification of marker-gene amplicon  
489 sequences with QIIME 2's q2-feature-classifier plugin. *Microbiome* 6:90.
- 490 13. Wu WK, Chen CC, Liu PY, Panyod S, Liao BY, Chen PC, Kao HL, Kuo HC, Kuo CH,  
491 Chiu THT, Chen RA, Chuang HL, Huang YT, Zou HB, Hsu CC, Chang TY, Lin CL, Ho  
492 CT, Yu HT, Sheen LY, Wu MS. 2019. Identification of TMAO-producer phenotype and  
493 host-diet-gut dysbiosis by carnitine challenge test in human and germ-free mice. *Gut*  
494 68:1439-1449.

- 495 14. Gohl DM, Vangay P, Garbe J, MacLean A, Hauge A, Becker A, Gould TJ, Clayton JB,  
496 Johnson TJ, Hunter R, Knights D, Beckman KB. 2016. Systematic improvement of  
497 amplicon marker gene methods for increased accuracy in microbiome studies. *Nat*  
498 *Biotechnol* 34:942-9.
- 499 15. Illumina. 2013. Illumina 16S metagenomic sequencing library preparation (Illumina  
500 Technical Note 15044223 Rev. A). [http://support.illumina.com/content/dam/illumina-](http://support.illumina.com/content/dam/illumina-support/documents/documentation/chemistry_documentation/16s/16s-metagenomic-library-prep-guide-15044223-b.pdf)  
501 [support/documents/documentation/chemistry\\_documentation/16s/16s-metagenomic-](http://support.illumina.com/content/dam/illumina-support/documents/documentation/chemistry_documentation/16s/16s-metagenomic-library-prep-guide-15044223-b.pdf)  
502 [library-prep-guide-15044223-b.pdf](http://support.illumina.com/content/dam/illumina-support/documents/documentation/chemistry_documentation/16s/16s-metagenomic-library-prep-guide-15044223-b.pdf). Accessed 2018/10.
- 503 16. Human Microbiome Project C. 2012. Structure, function and diversity of the healthy  
504 human microbiome. *Nature* 486:207-14.
- 505 17. Sinclair L, Osman OA, Bertilsson S, Eiler A. 2015. Microbial community composition  
506 and diversity via 16S rRNA gene amplicons: evaluating the illumina platform. *PLoS One*  
507 10:e0116955.
- 508 18. Thompson LR, Sanders JG, McDonald D, Amir A, Ladau J, Locey KJ, Prill RJ, Tripathi  
509 A, Gibbons SM, Ackermann G, Navas-Molina JA, Janssen S, Kopylova E, Vazquez-  
510 Baeza Y, Gonzalez A, Morton JT, Mirarab S, Zech Xu Z, Jiang L, Haroon MF, Kanbar J,  
511 Zhu Q, Jin Song S, Kosciolk T, Bokulich NA, Lefler J, Brislawn CJ, Humphrey G,  
512 Owens SM, Hampton-Marcell J, Berg-Lyons D, McKenzie V, Fierer N, Fuhrman JA,  
513 Clauset A, Stevens RL, Shade A, Pollard KS, Goodwin KD, Jansson JK, Gilbert JA,  
514 Knight R, Earth Microbiome Project C. 2017. A communal catalogue reveals Earth's  
515 multiscale microbial diversity. *Nature* 551:457-463.
- 516 19. Gilbert JA, Jansson JK, Knight R. 2018. Earth Microbiome Project and Global Systems  
517 Biology. *mSystems* 3.
- 518 20. Caporaso JG, Lauber CL, Costello EK, Berg-Lyons D, Gonzalez A, Stombaugh J,  
519 Knights D, Gajer P, Ravel J, Fierer N, Gordon JI, Knight R. 2011. Moving pictures of the  
520 human microbiome. *Genome Biol* 12:R50.
- 521 21. McDonald D, Hyde E, Debelius JW, Morton JT, Gonzalez A, Ackermann G, Aksenov  
522 AA, Behsaz B, Brennan C, Chen Y, DeRight Goldasich L, Dorrestein PC, Dunn RR,  
523 Fahimipour AK, Gaffney J, Gilbert JA, Gogul G, Green JL, Hugenholtz P, Humphrey G,  
524 Huttenhower C, Jackson MA, Janssen S, Jeste DV, Jiang L, Kelley ST, Knights D,  
525 Kosciolk T, Ladau J, Leach J, Marotz C, Meleshko D, Melnik AV, Metcalf JL,  
526 Mohimani H, Montassier E, Navas-Molina J, Nguyen TT, Peddada S, Pevzner P, Pollard  
527 KS, Rahnavard G, Robbins-Pianka A, Sangwan N, Shorenstein J, Smarr L, Song SJ,  
528 Spector T, Swafford AD, Thackray VG, et al. 2018. American Gut: an Open Platform for  
529 Citizen Science Microbiome Research. *mSystems* 3.
- 530 22. Caporaso JG, Lauber CL, Walters WA, Berg-Lyons D, Lozupone CA, Turnbaugh PJ,  
531 Fierer N, Knight R. 2011. Global patterns of 16S rRNA diversity at a depth of millions of  
532 sequences per sample. *Proc Natl Acad Sci U S A* 108 Suppl 1:4516-22.
- 533 23. Nearing JT, Douglas GM, Comeau AM, Langille MGI. 2018. Denoising the Denoisers:  
534 an independent evaluation of microbiome sequence error-correction approaches. *PeerJ*  
535 6:e5364.
- 536 24. Callahan BJ, McMurdie PJ, Rosen MJ, Han AW, Johnson AJ, Holmes SP. 2016. DADA2:  
537 High-resolution sample inference from Illumina amplicon data. *Nat Methods* 13:581-3.
- 538 25. Amir A, McDonald D, Navas-Molina JA, Kopylova E, Morton JT, Zech Xu Z, Kightley  
539 EP, Thompson LR, Hyde ER, Gonzalez A, Knight R. 2017. Deblur Rapidly Resolves  
540 Single-Nucleotide Community Sequence Patterns. *mSystems* 2.

- 541 26. Edgar RC, Flyvbjerg H. 2015. Error filtering, pair assembly and error correction for next-  
542 generation sequencing reads. *Bioinformatics* 31:3476-82.
- 543 27. Edgar RC. 2016. UNOISE2: improved error-correction for Illumina 16S and ITS  
544 amplicon sequencing. *bioRxiv* doi:10.1101/081257:081257.
- 545 28. Bolyen E, Rideout JR, Dillon MR, Bokulich NA, Abnet C, Al-Ghalith GA, Alexander H,  
546 Alm EJ, Arumugam M, Asnicar F, Bai Y, Bisanz JE, Bittinger K, Brejnrod A, Brislawn  
547 CJ, Brown CT, Callahan BJ, Caraballo-Rodríguez AM, Chase J, Cope E, Da Silva R,  
548 Dorrestein PC, Douglas GM, Durall DM, Duvall C, Edwardson CF, Ernst M, Estaki M,  
549 Fouquier J, Gauglitz JM, Gibson DL, Gonzalez A, Gorlick K, Guo J, Hillmann B,  
550 Holmes S, Holste H, Huttenhower C, Huttley G, Janssen S, Jarmusch AK, Jiang L,  
551 Kaehler B, Kang KB, Keefe CR, Keim P, Kelley ST, Knights D, Koester I, Kosciolk T,  
552 et al. 2018. QIIME 2: Reproducible, interactive, scalable, and extensible microbiome data  
553 science. *PeerJ Preprints* 6.
- 554 29. Wetterstrand KA. DNA Sequencing Costs: Data from the NHGRI Genome Sequencing  
555 Program (GSP) [www.genome.gov/sequencingcostsdata](http://www.genome.gov/sequencingcostsdata). Accessed 2020/07/06.
- 556 30. Holm JB, Humphrys MS, Robinson CK, Settles ML, Ott S, Fu L, Yang H, Gajer P, He X,  
557 McComb E, Gravitt PE, Ghanem KG, Brotman RM, Ravel J. 2019. Ultrahigh-  
558 Throughput Multiplexing and Sequencing of >500-Base-Pair Amplicon Regions on the  
559 Illumina HiSeq 2500 Platform. *mSystems* 4.
- 560 31. Quast C, Pruesse E, Yilmaz P, Gerken J, Schweer T, Yarza P, Peplies J, Glockner FO.  
561 2013. The SILVA ribosomal RNA gene database project: improved data processing and  
562 web-based tools. *Nucleic Acids Res* 41:D590-6.
- 563 32. Yilmaz P, Parfrey LW, Yarza P, Gerken J, Pruesse E, Quast C, Schweer T, Peplies J,  
564 Ludwig W, Glockner FO. 2014. The SILVA and "All-species Living Tree Project (LTP)"  
565 taxonomic frameworks. *Nucleic Acids Research* 42:D643-D648.
- 566 33. Integrative HMP RNC. 2014. The Integrative Human Microbiome Project: dynamic  
567 analysis of microbiome-host omics profiles during periods of human health and disease.  
568 *Cell Host Microbe* 16:276-89.
- 569 34. Glenn TC, Pierson TW, Bayona-Vasquez NJ, Kieran TJ, Hoffberg SL, Thomas IV JC,  
570 Lefever DE, Finger JW, Gao B, Bian X, Louha S, Kolli RT, Bentley KE, Rushmore J,  
571 Wong K, Shaw TI, Rothrock MJ, Jr., McKee AM, Guo TL, Mauricio R, Molina M,  
572 Cummings BS, Lash LH, Lu K, Gilbert GS, Hubbell SP, Faircloth BC. 2019. Adapterama  
573 II: universal amplicon sequencing on Illumina platforms (TaggiMatrix). *PeerJ* 7:e7786.
- 574 35. Lawrence CB, Solovyev VV. 1994. Assignment of position-specific error probability to  
575 primary DNA sequence data. *Nucleic Acids Res* 22:1272-80.
- 576 36. Caporaso JG, Lauber CL, Walters WA, Berg-Lyons D, Huntley J, Fierer N, Owens SM,  
577 Betley J, Fraser L, Bauer M, Gormley N, Gilbert JA, Smith G, Knight R. 2012. Ultra-  
578 high-throughput microbial community analysis on the Illumina HiSeq and MiSeq  
579 platforms. *ISME J* 6:1621-4.
- 580 37. Wu WK, Chen CC, Panyod S, Chen RA, Wu MS, Sheen LY, Chang SC. 2019.  
581 Optimization of fecal sample processing for microbiome study - The journey from  
582 bathroom to bench. *J Formos Med Assoc* 118:545-555.
- 583 38. Klindworth A, Pruesse E, Schweer T, Peplies J, Quast C, Horn M, Glockner FO. 2013.  
584 Evaluation of general 16S ribosomal RNA gene PCR primers for classical and next-  
585 generation sequencing-based diversity studies. *Nucleic Acids Res* 41:e1.

- 586 39. Ghyselinck J, Pfeiffer S, Heylen K, Sessitsch A, De Vos P. 2013. The effect of primer  
587 choice and short read sequences on the outcome of 16S rRNA gene based diversity  
588 studies. PLoS One 8:e71360.
- 589 40. R Core Team. 2015. R: A language and environment for statistical computing, R  
590 Foundation for Statistical Computing, Vienna, Austria, <https://www.R-project.org/>.
- 591 41. Oksanen J, Blanchet FG, Kindt R, Legendre P, Minchin PR, O'Hara RB, Simpson GL,  
592 Solymos P, Stevens MHH, Wagner H. 2015. vegan: community ecology package. R  
593 package version 2.3-1, Oulu, Finland. <https://CRAN.R-project.org/package=vegan>.
- 594
- 595



596 **TABLE 1** Summary of the estimated 16S amplicon sequencing throughputs and costs for MiSeq and NextSeq platforms

|                                                                                                         | <b>MiSeq</b>                          | <b>NextSeq, mid-output</b>              | <b>NextSeq, high-output</b>                                             |
|---------------------------------------------------------------------------------------------------------|---------------------------------------|-----------------------------------------|-------------------------------------------------------------------------|
| Flow cell configuration                                                                                 | 600 cycles (300-bp PE)                | 300 cycles (150-bp PE)                  | 300 cycles (150-bp PE)                                                  |
| Throughput                                                                                              | 13.2–15 Gb (44–50M reads)             | 32.5–39 Gb (216–260M reads)             | 100–120 Gb (660–800M reads)                                             |
| Data quality <sup>a</sup>                                                                               | >70%, >Q30                            | >75%, >Q30                              | >75%, >Q30                                                              |
| Targeted 16S hypervariable regions                                                                      | V3V4, V4                              | V4                                      | V4                                                                      |
| No. samples per run per 100K PE reads (Nextera XT 2-Step PCR) <sup>b</sup>                              | 175 (out of the possible 384 samples) | 384 (39.4% read output of a single run) | 384 (12.8% read output of a single run)                                 |
| Maximum no. samples per run per 100K PE reads [Caporaso et al. (36), protocol, 1-Step PCR] <sup>c</sup> | 175 (out of possible 2168 samples)    | 975 (out of possible 2168 samples)      | 2168 (all possible index combinations, 72% read output of a single run) |
| Cost of sequencing per 100K-read output per sample <sup>d</sup>                                         | US\$15.2                              | US\$3.4                                 | US\$2.8                                                                 |

597 <sup>a</sup>Data quality scores (average % of bases over the entire run), as reported by Illumina documents (15).

598 <sup>b</sup>Quality read outputs were determined as maximum Q30 proportion, 291-bp V4 insert size, and less than 10-bp overlap of 150-bp PE  
599 reads. PE: paired-end.

600 <sup>c</sup>V4 insert size of 252 bp.

601 <sup>d</sup>The costs (in US dollars) were determined based on the prices cited by the Medical Microbiota Center of the First Core Laboratory,  
602 National Taiwan University College of Medicine (Taipei, Taiwan).

603

604 **TABLE 2** Coverage rates of *in silico* PCR simulation with the V3V4 and V4 primers

|                          | <b>Sequences<br/>obtained<br/>after <i>in silico</i> PCR</b> | <b>Proportion of<br/>all DB sequences<sup>b</sup></b> | <b>Fraction of<br/>V3V4 sequences</b> |
|--------------------------|--------------------------------------------------------------|-------------------------------------------------------|---------------------------------------|
| SILVA NR132              |                                                              |                                                       |                                       |
| 99 represented sequences | 369,953                                                      | 1.000                                                 | 1.293                                 |
| V3V4                     | 286,083                                                      | 0.773                                                 | 1.000                                 |
| V4O                      | 302,383                                                      | 0.817                                                 | 1.057                                 |
| V4N                      | 244,801                                                      | 0.662                                                 | 0.856                                 |
| tV4O <sup>a</sup>        | 268,308                                                      | 0.725                                                 | 0.938                                 |
| tV4N <sup>a</sup>        | 218,908                                                      | 0.592                                                 | 0.765                                 |

605 <sup>a</sup>t in tV4O and tV4N, V4O fragments trimmed from V3V4 fragments.

606 <sup>b</sup>SILVA 132 database (16S rRNA gene clustering at 99%).

607

608 **TABLE 3** Summary of sequencing efficacies (*in silico* and empirical data), considering the coverage rate, taxonomic identification  
609 rate, and taxonomic abundance, and depending on the primers and analysis approaches<sup>a</sup>

|                      |                                              | V3V4   | V4O              | V4O SE          | V4N              | V4N SE          | tV4O   | tV4N   |
|----------------------|----------------------------------------------|--------|------------------|-----------------|------------------|-----------------|--------|--------|
|                      | Insert size                                  | 465 bp | 291 bp           | Up to<br>150 bp | 279 bp           | Up to<br>150 bp | 291 bp | 291 bp |
|                      | Platform                                     | 300 PE | 300 PE           |                 | 300 PE           |                 | 300 PE | 300 PE |
|                      |                                              | 250 PE | 250 PE           | >150 SE         | 250 PE           | >150 SE         | 250 PE | 250 PE |
| <i>In silico</i> PCR | Coverage rate of DB                          | 0.773  | 0.817            | –               | 0.662            | –               | 0.725  | 0.592  |
|                      | Accuracy of phylum classification from DB    | 84.77% | 93.56%           | –               | 70.00%           | –               | 83.10% | 63.31% |
|                      | Archaea                                      | 0.02%  | Detectable (>4%) |                 | Detectable (>3%) |                 | 0.02%  | <0.01% |
| Empirical data       | Phylum detection bias (vs. V3V4)             | –      | 7.23%            | 6.99%           | 10.49%           | 10.36%          | 0.35%  | 0.34%  |
|                      | Accuracy of phylum classification (vs. V3V4) | –      | 92.80%           | 93.02%          | 89.53%           | 89.65%          | 99.63% | 99.67% |
|                      | Accuracy of phylum classification (vs. V4O)  | 92.80% | –                | 99.67%          | 90.32%           | 90.09%          | 92.76% | 92.53% |
|                      | Taxonomic abundance correlation with V3V4    | –      | 0.67             | 0.54            | 0.68             | 0.56            | 0.68   | 0.69   |
|                      | Taxonomic abundance correlation with V4O     | 0.67   | –                | 0.75            | 0.92             | 0.77            | 0.99   | 0.93   |

610 <sup>a</sup>SE for V4O SE and V4N SE, single-end analysis pipeline for V4O primer; t for tV4O and tV4N, V4O fragments trimmed from V3V4 fragments; DB, SILVA  
611 132 database (16S rRNA gene clustering at 99%).

612 **Figures**

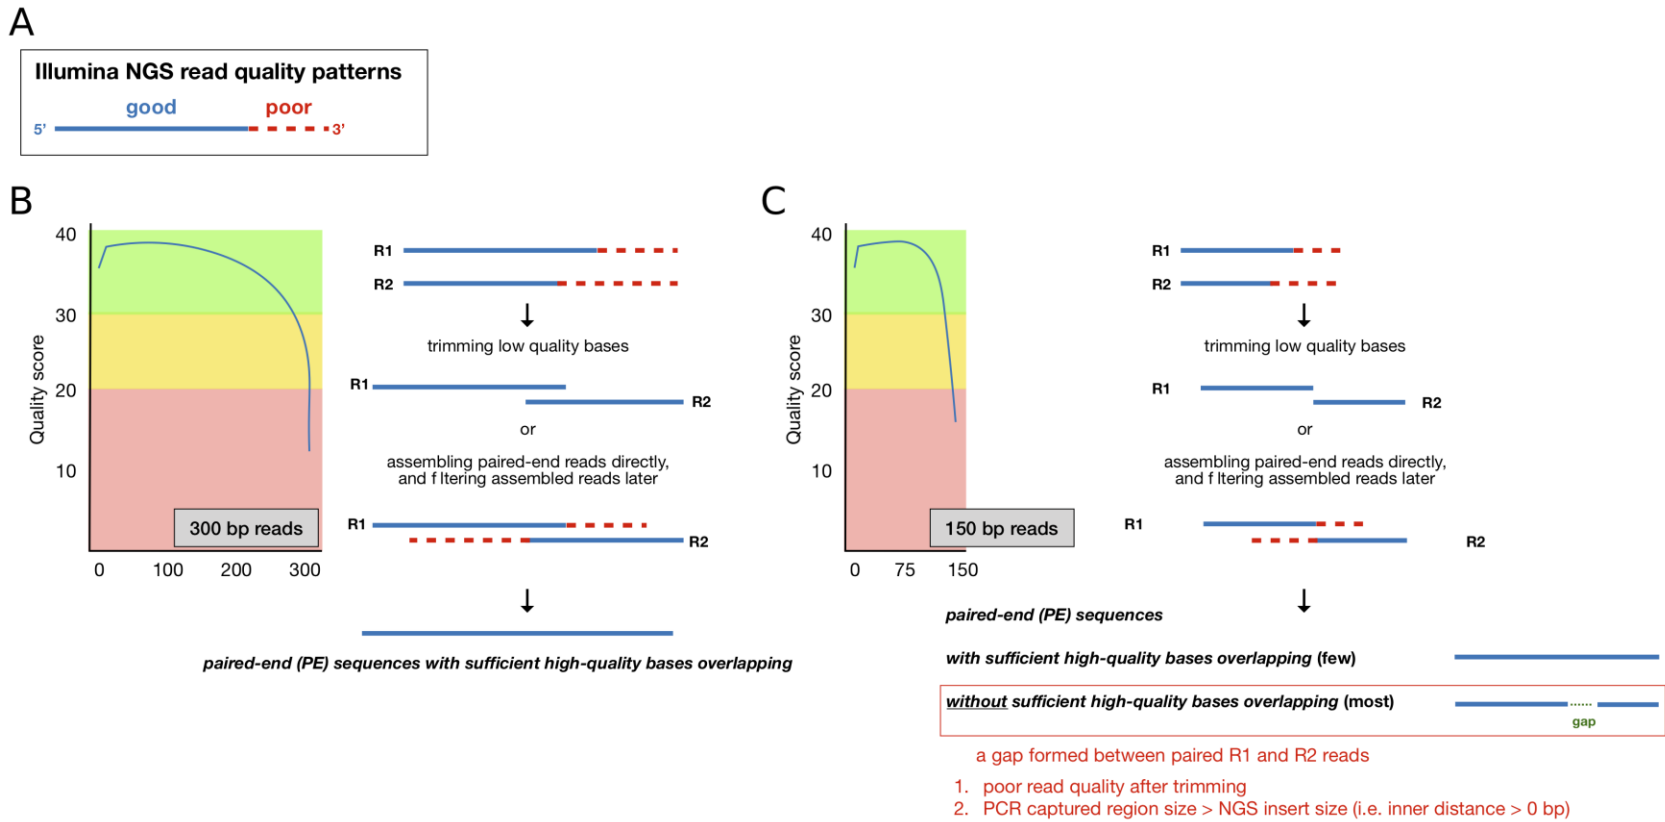

613

614 **FIG 1** NGS read-quality pattern diagram. (A) Illumina read-quality patterns: from the 5'-end to 3'-end, the quality per base decreases

615 and is usually trimmed (red dashed line) before assembly. (B) The 300-bp paired-end (PE) read-quality distribution and amplicon

616 stitching procedures. The 300-bp PE reads with sufficiently long overlapping regions are stitched together. (C) The 150-bp PE read-

617 quality distribution and amplicon stitching procedures. Only a few read-pairs pass the quality filtering and assembly at both ends.

618 Most 150-bp PE reads either fail to pass the quality control or fail to recover amplicon inserts that are too long.

619

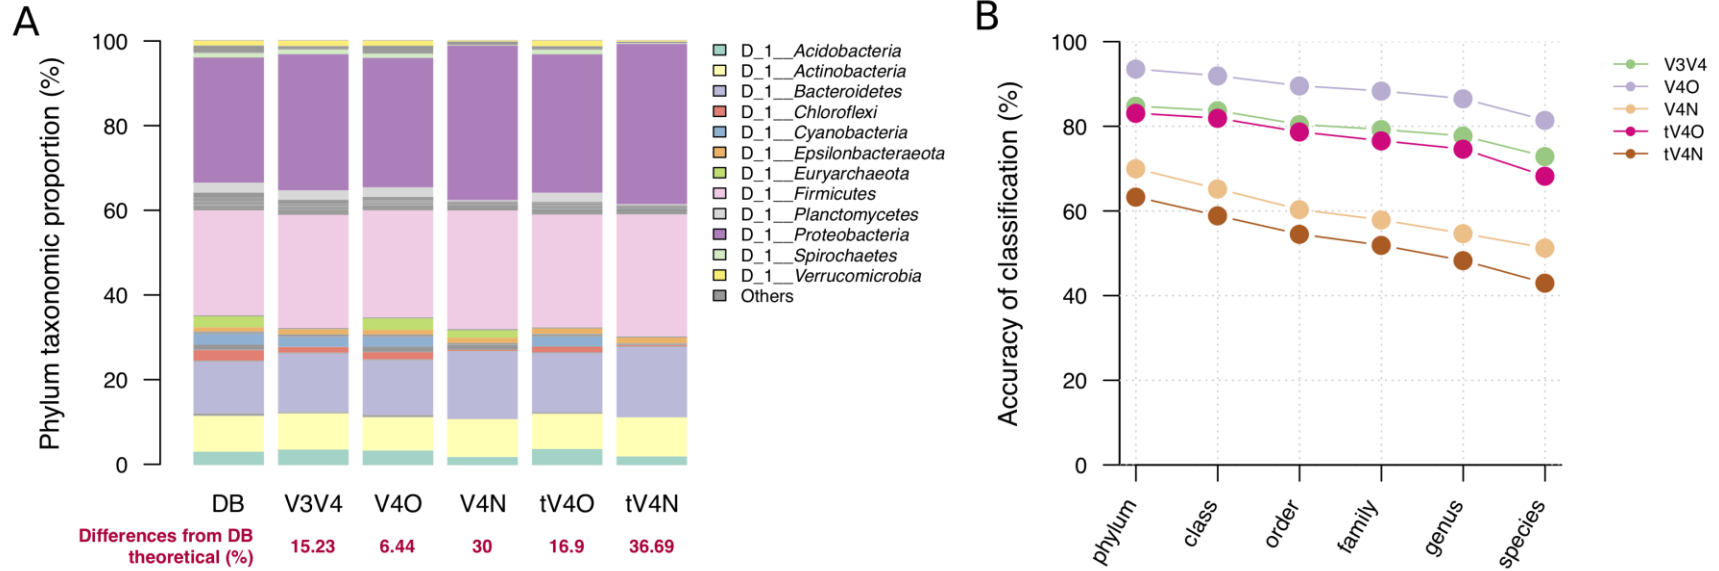

620

621 **FIG 2** Taxonomic profiling via *in silico* PCR simulation. (A) Phylum composition of the SILVA 16S database and extracted phylum

622 composition for the five tested conditions of *in silico* PCR. (B) Phylum to species taxonomic accuracies (against taxonomic

623 assignment in the SILVA 16S database) for the five conditions of *in silico* PCR. The five conditions for *in silico* PCR were as follows:

624 V3V4 (341F–805R), V4O (515F–806R), V4N (519F–798R), tV4O (trimmed V4O from V3V4), and tV4N (trimmed V4N from V3V4).

625

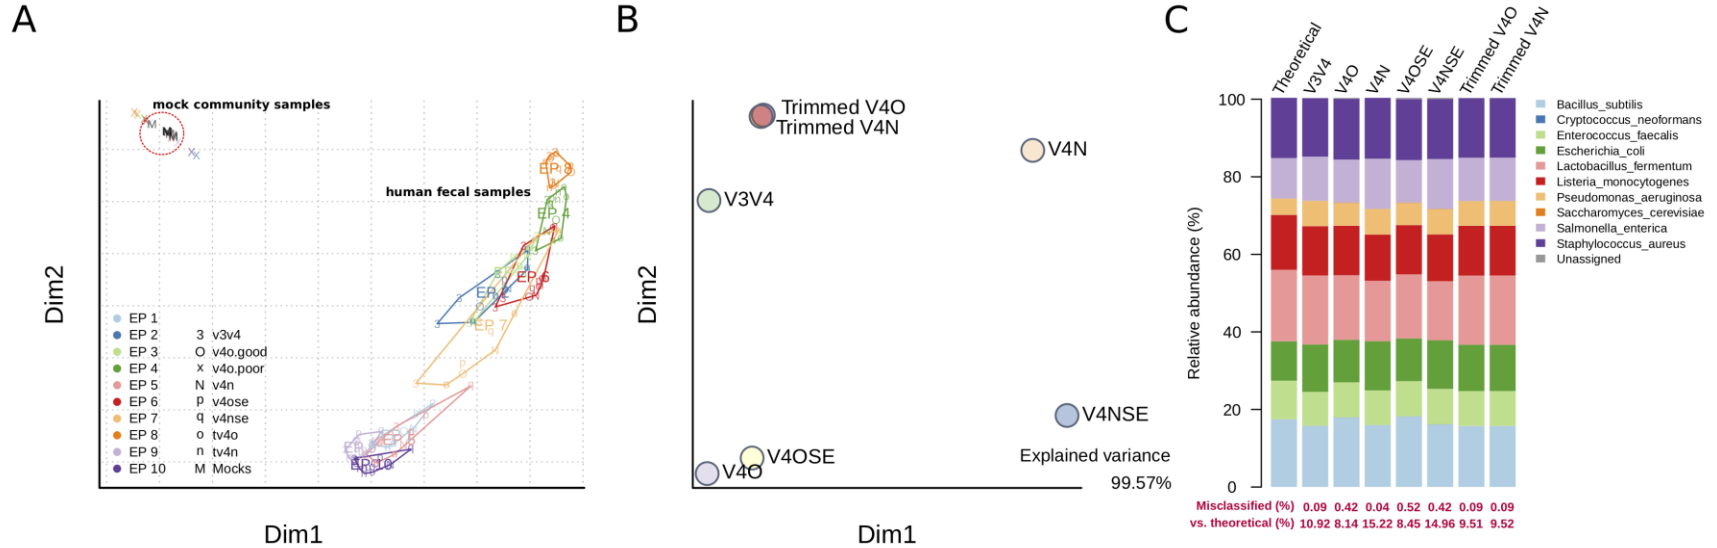

626

627 **FIG 3** Compatibility evaluation for three primer-amplification and seven analytical approaches, using a mock microbial community  
 628 sample. (A) Beta-diversity ordination (Bray–Curtis dissimilarity) of the human fecal microbiome (EP1–EP10; colored symbols) and  
 629 mock community (M; black symbols) sequencing samples. Notation: 3, V3V4 amplicon library; O, successful assembly of V4O  
 630 amplicon library; x, failed assembly of V4O amplicon library; N, V4N amplicon library; p, V4OSE, single-end analysis using V4O  
 631 amplicon library; q, V4NSE, single-end analysis using V4N amplicon library; o, tV4O, trimmed V4O amplicon from V3V4 library; n,  
 632 tV4N, trimmed V4N amplicon from V3V4 library. The mock community sample analyzed by seven analytical approaches clustered  
 633 together and away from data for 10 individual human fecal microbiomes. (B) Beta-diversity ordination of the seven analytical  
 634 approaches used for the analysis of mock community data. (C) The relative abundance of bacteria in the mock community, comparing  
 635 the theoretical composition with that obtained by seven analytical approaches.





637

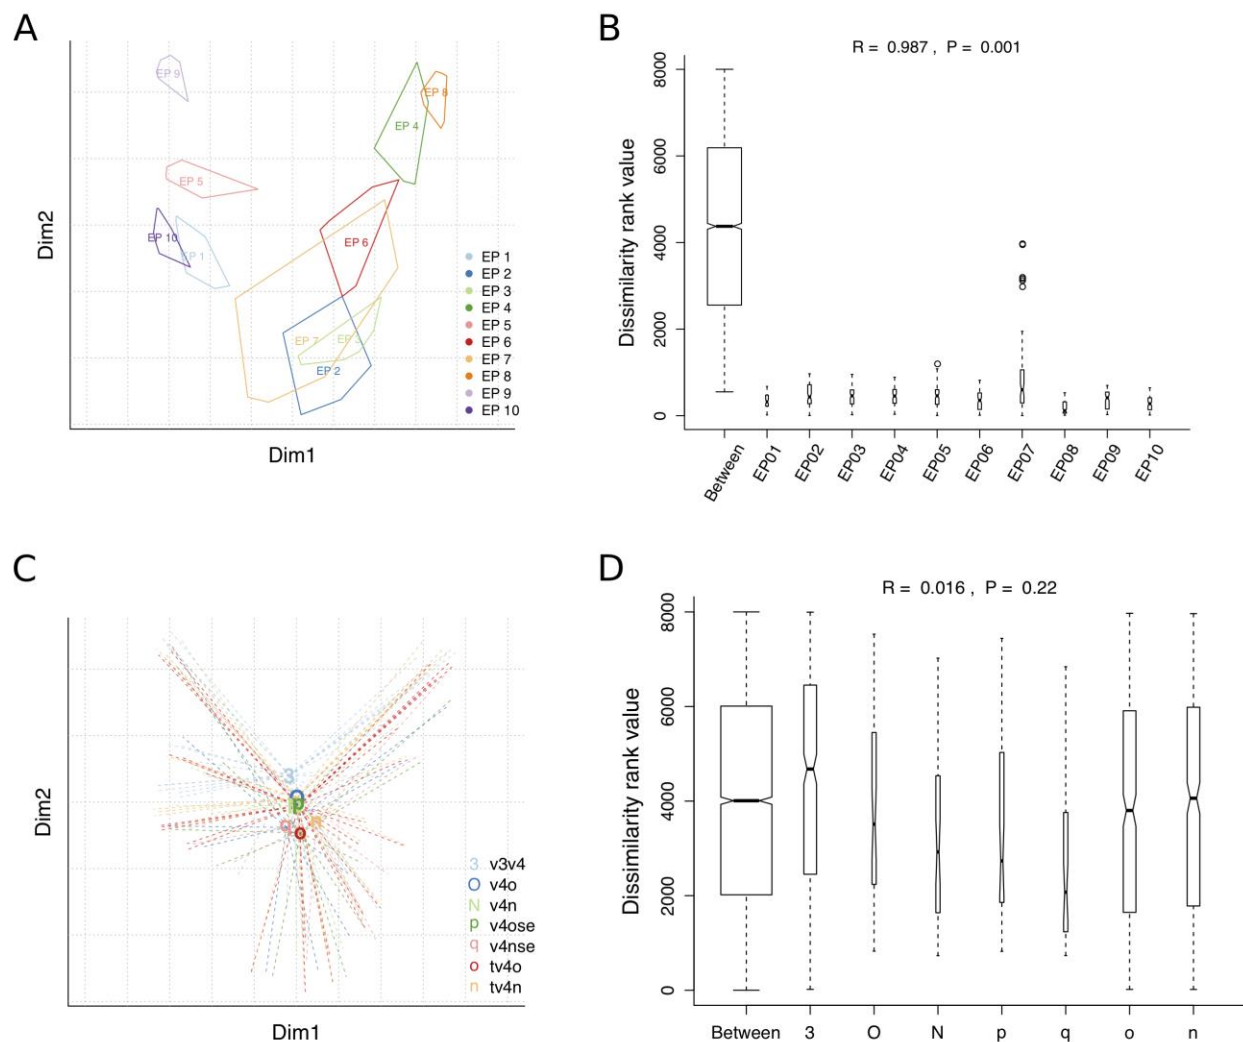

638

639 **FIG 4** Compatibility evaluation of three primer-amplification and seven analytical approaches

640 by testing the heterogeneity of 10 human fecal microbiomes. (A) Beta-diversity ordination

641 (Bray–Curtis dissimilarity) of 10 human fecal microbiome samples (colored-border polygons,

642 EP1–EP10). (B) Nested analysis of similarity (ANOSIM) of individual testing approaches,

643 nested by the analytical approach;  $R=0.987$ ,  $P=0.001$ . (C) Beta-diversity ordination of 10 human

644 fecal microbiome samples (radial lines; the analytical approaches are labeled in the center). (D)

645 Nested ANOSIM of the analytical approaches nested by individuals;  $R=0.016$ ,  $P=0.22$ .

646 Abbreviations are as in Fig. 3.

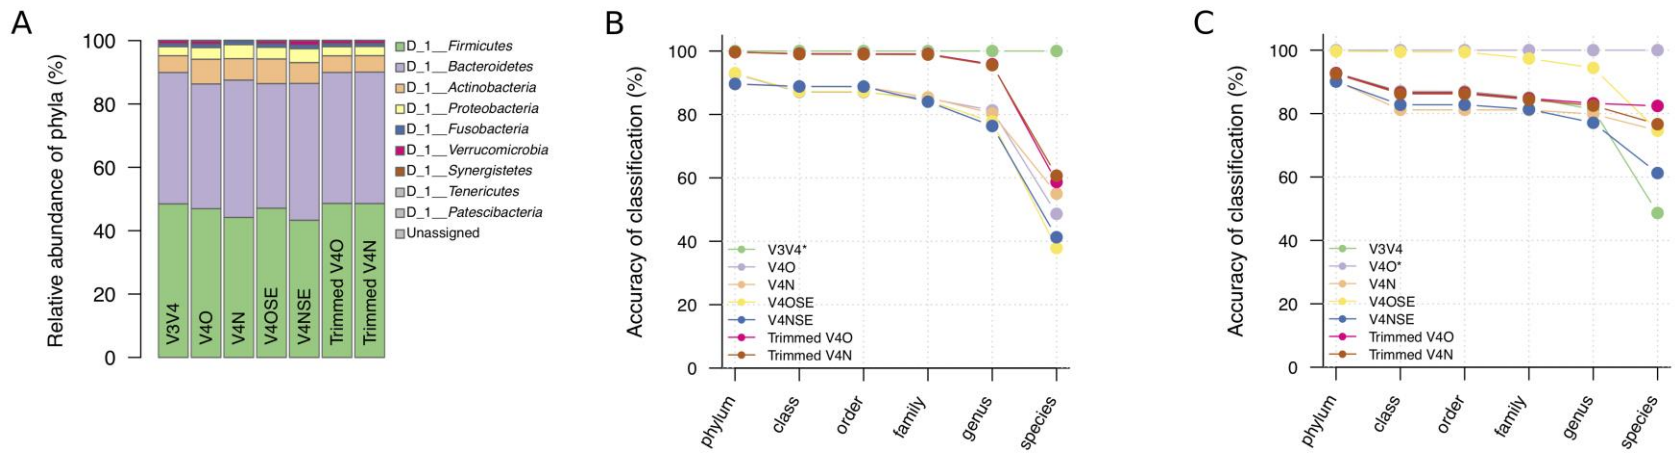

647

648 **FIG 5** Phylum compositions and taxonomic accuracy of the human fecal microbiomes analyzed by seven analytical approaches. (A)

649 Phylum compositions of the human fecal microbiome (10 individuals average per stacked bar) analyzed by seven analytical

650 approaches. (B) Phylum to species taxonomic accuracies based on the V3V4 taxonomy assignment. (C) Phylum to species taxonomic

651 accuracies based on the V4O taxonomy assignment. Abbreviations are as in Fig. 3.

652

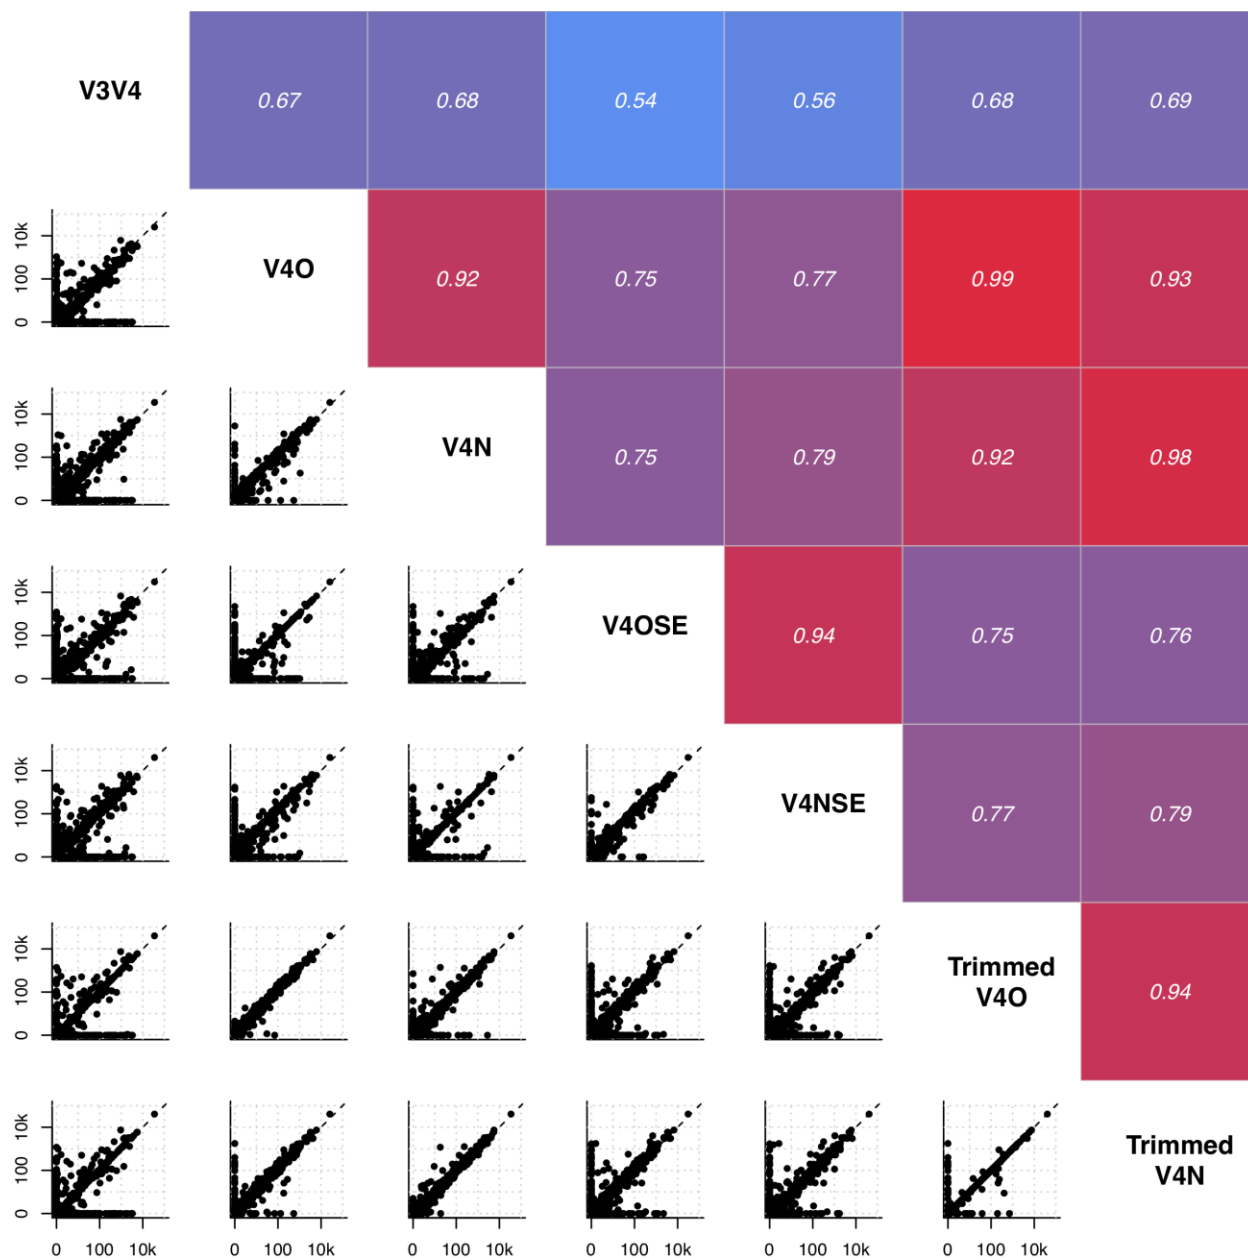

653

654 **FIG 6** Taxonomic abundance correlations of seven analytical approaches. Lower left panels,  
 655 pairwise taxonomic abundance correlations. Each point is an amplicon sequence variant shared  
 656 by any two-analysis sets. Upper right panels, Pearson's correlation coefficients for pairwise  
 657 taxonomic abundance correlations; all tests were significant. Abbreviations are as in Fig. 3.

658

659

660

661 **SUPPLEMENTARY FIGURE LEGENDS**

662 **FIG S1** Alpha-diversity indices obtained with seven analytical approaches by testing the  
663 heterogeneity of 10 human fecal microbiomes. (A) Richness (amplicon sequence variant  
664 number). (B) Shannon entropy. (C) Simpson index of diversity. All indices were tested by  
665 Kruskal–Wallis rank sum test with  $\alpha = 0.05$ . The seven analytical approaches were as  
666 follows: paired-end V3V4 amplicons (V3V4), paired-end V4O amplicons (V4O), paired-end  
667 V4N amplicons (V4N), single-end V4O amplicons (V4OSE), single-end V4N amplicons  
668 (V4NSE), and V4 amplicons trimmed from V3V4 (trimmed V4O, tV4O; and trimmed V4N,  
669 tV4N).

670

671 **FIG S2** Taxonomic rank abundances obtained with seven analytical approaches by testing the  
672 heterogeneity of 10 human fecal microbiomes. (A) Family rank abundance. Bar fill color  
673 corresponds to the phylum. (B) Genus rank abundance. Abbreviations are as in Fig. S1.

**A**

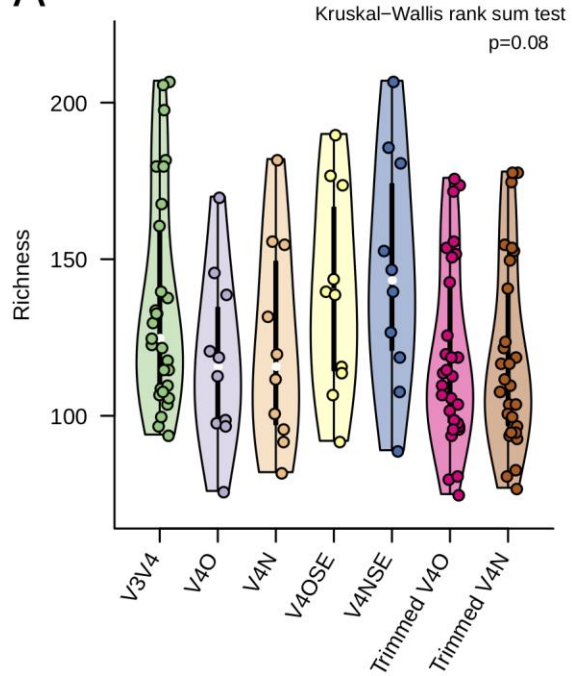

**B**

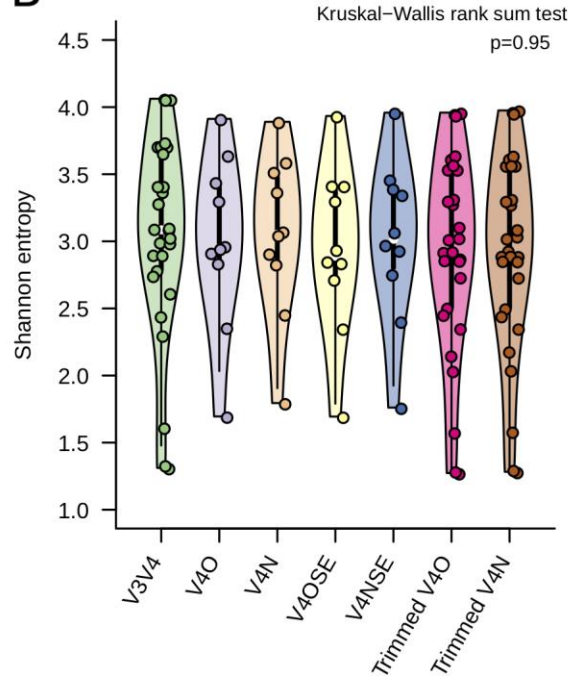

**C**

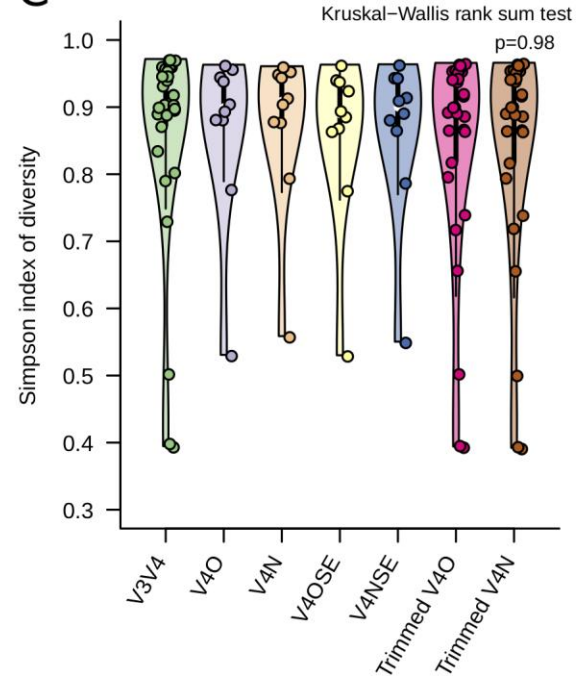

675  
676 **FIG S1**  
677

A

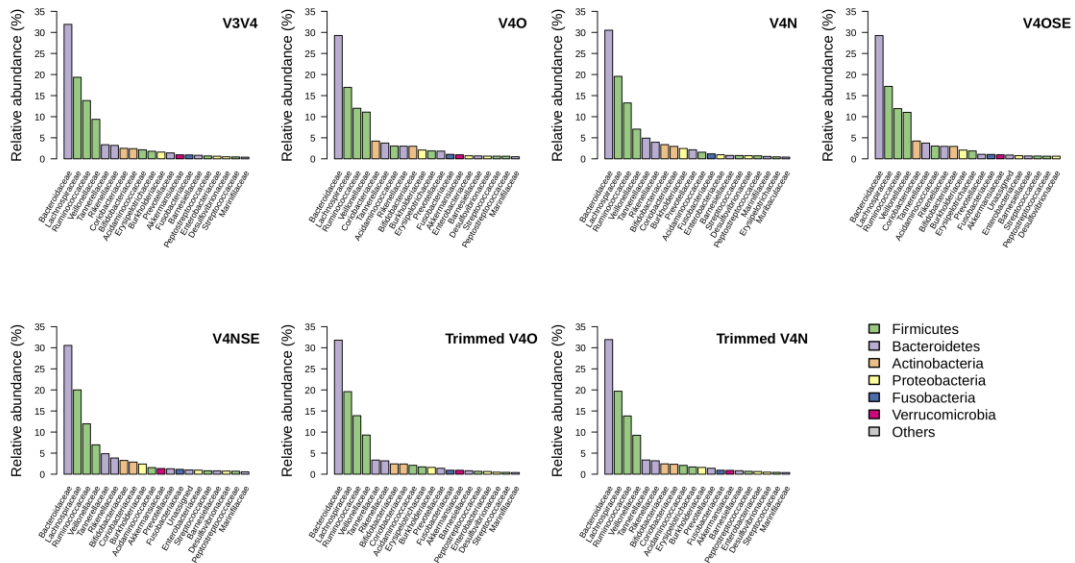

B

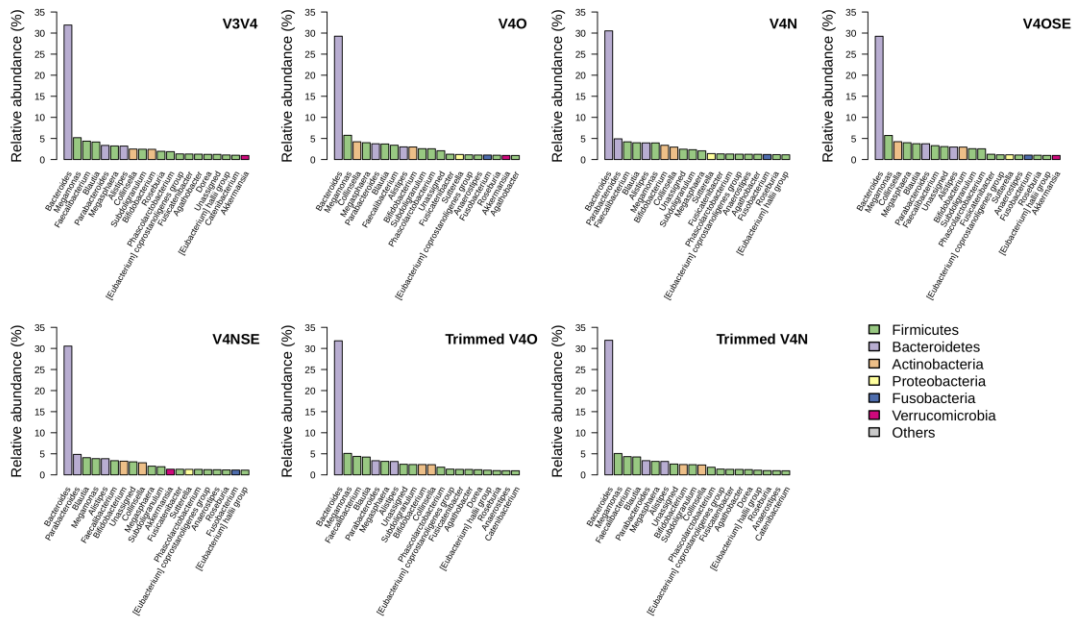

678  
679  
680

FIG S2

681 **Supplementary Table**

682

683 **TABLE S1** *In-silico* archaeal sequence capture rates of the V3V4 and V4 primers

|                                         | <b>Number of archaeal sequences</b> | <b>Percentage of captured archaea within dataset</b> |
|-----------------------------------------|-------------------------------------|------------------------------------------------------|
| SILVA NR132<br>99 represented sequences | 19,501                              | 5.27%                                                |
| V3V4                                    | 69                                  | 0.024%                                               |
| V4O                                     | 15,916                              | 5.26%                                                |
| V4N                                     | 8320                                | 3.40%                                                |
| tV4O                                    | 65                                  | 0.024%                                               |
| tV4N                                    | 11                                  | 0.005%                                               |

684

685

686



A

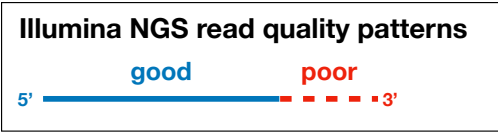

B

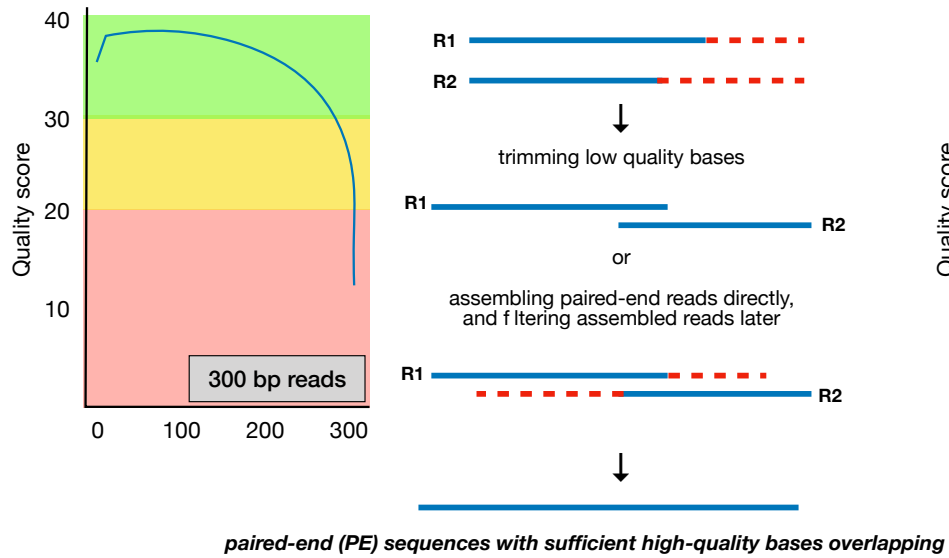

C

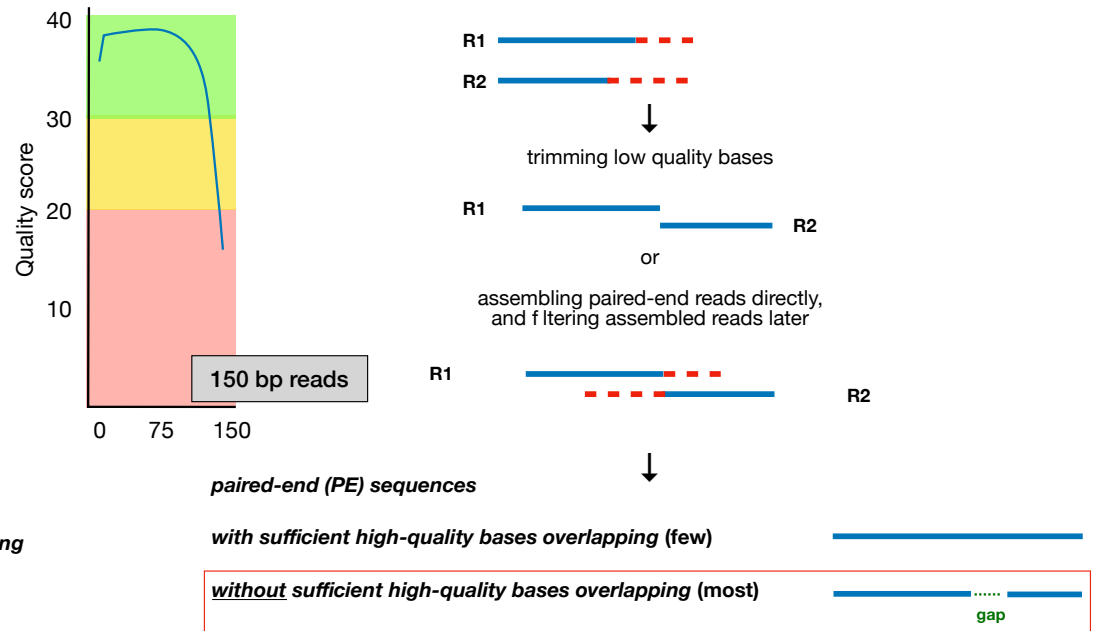

a gap formed between paired R1 and R2 reads

1. poor read quality after trimming
2. PCR captured region size > NGS insert size (i.e. inner distance > 0 bp)

A

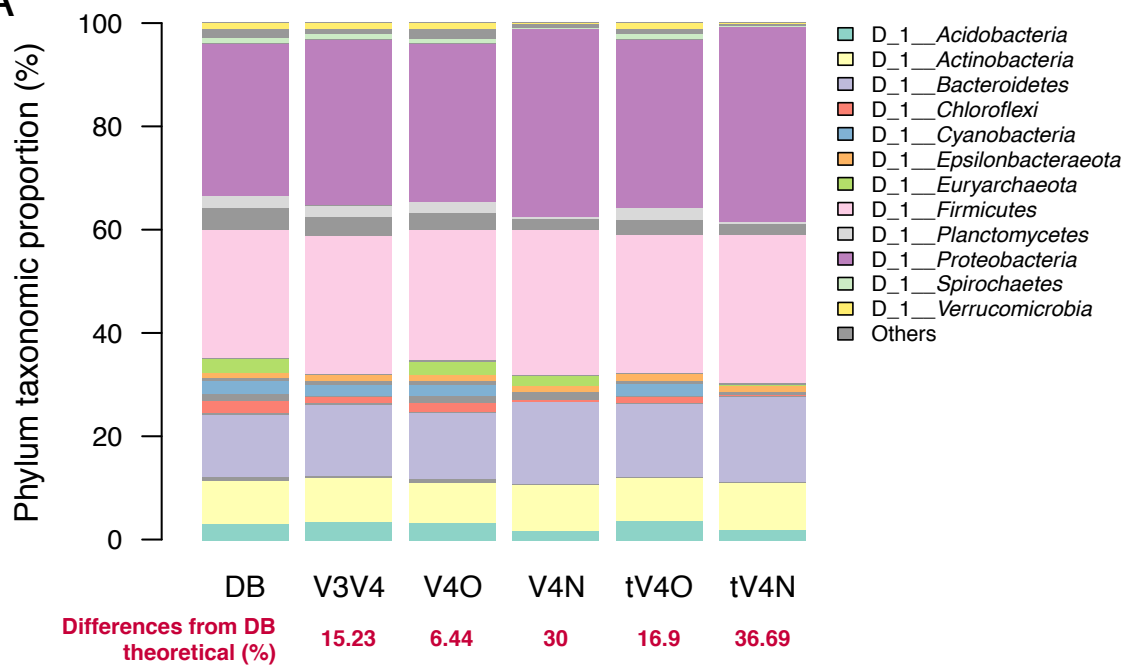

B

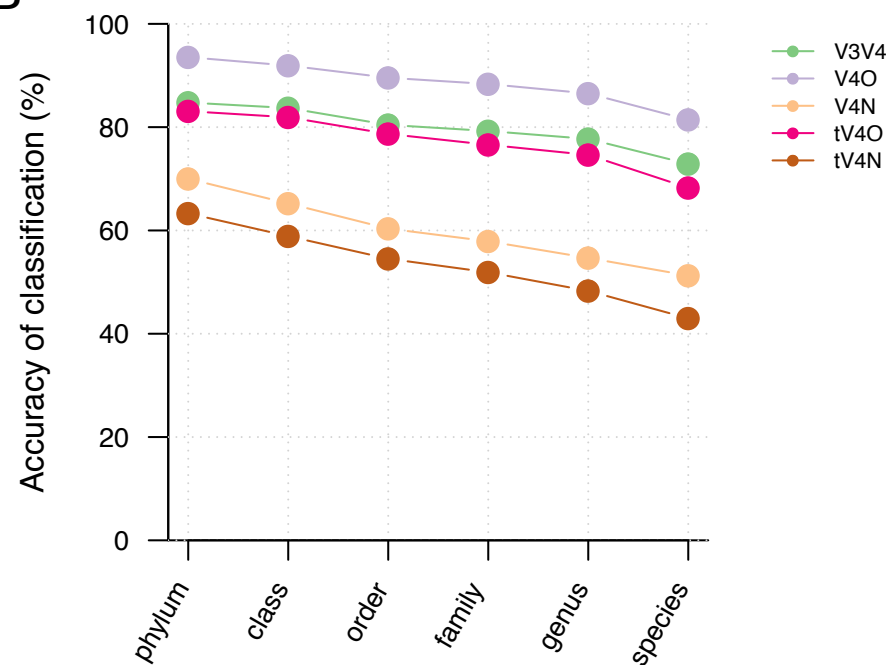

A

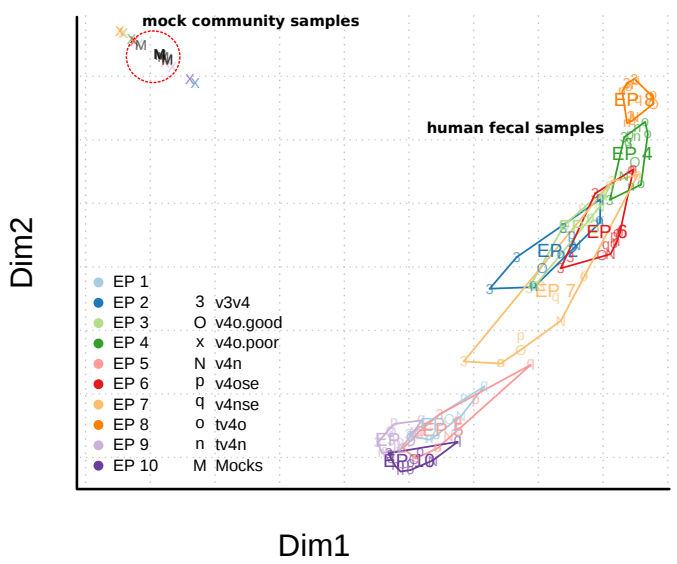

B

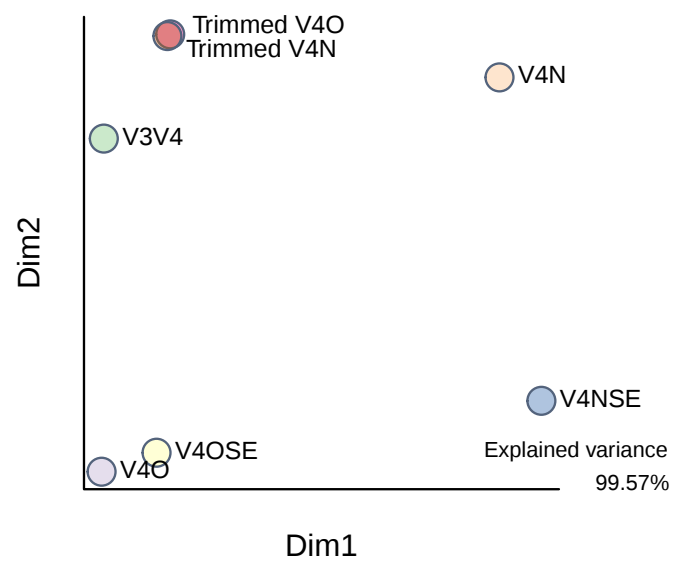

C

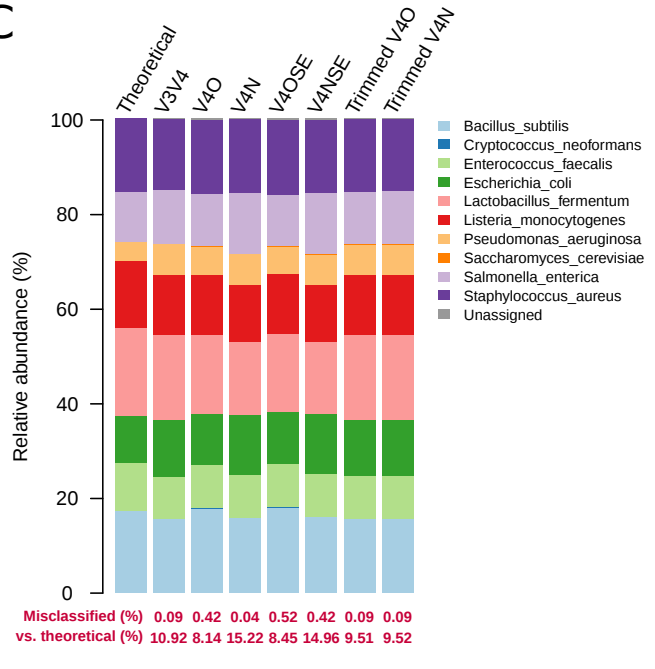

**A**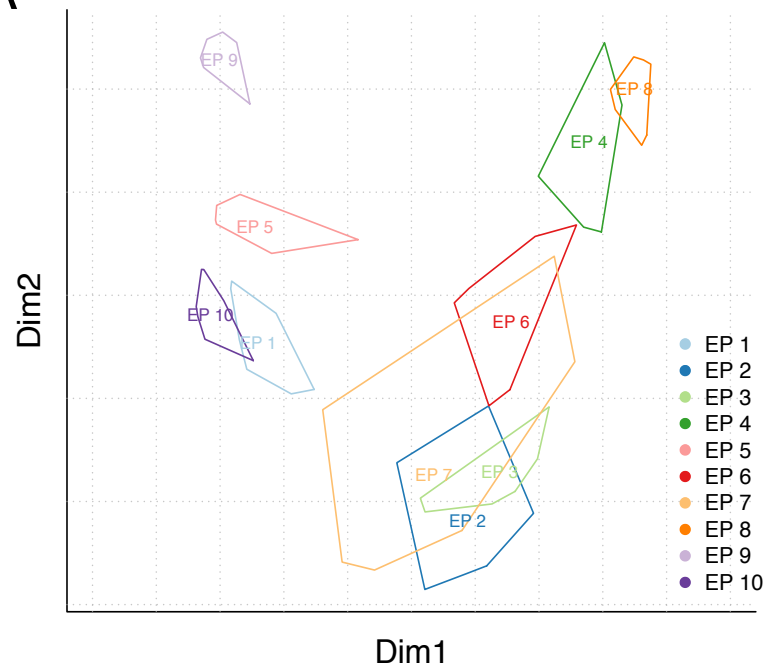**B**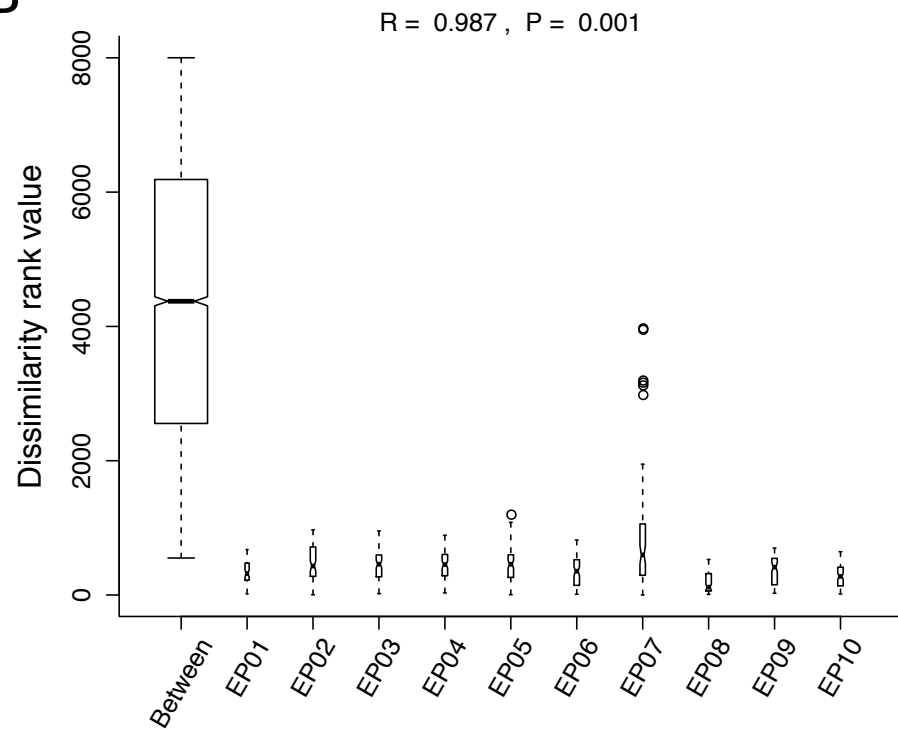**C**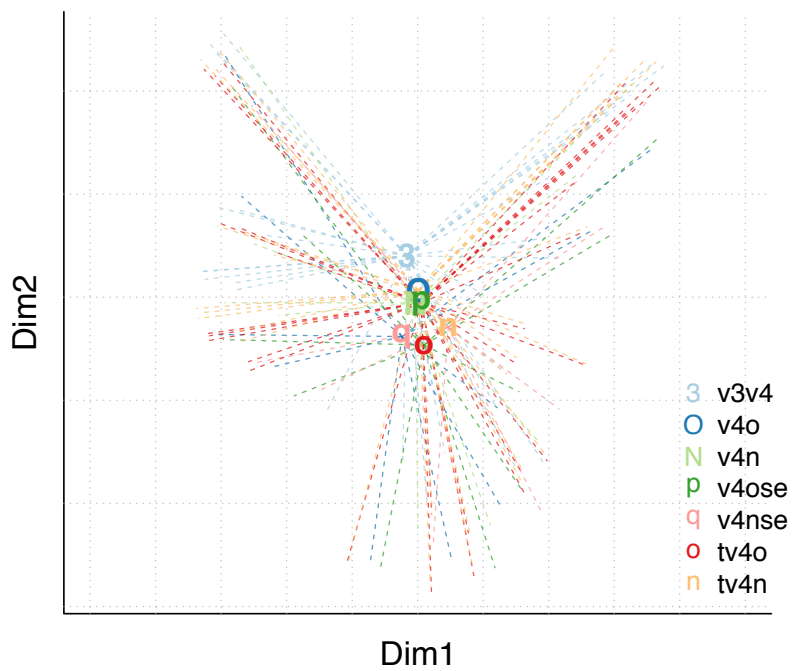**D**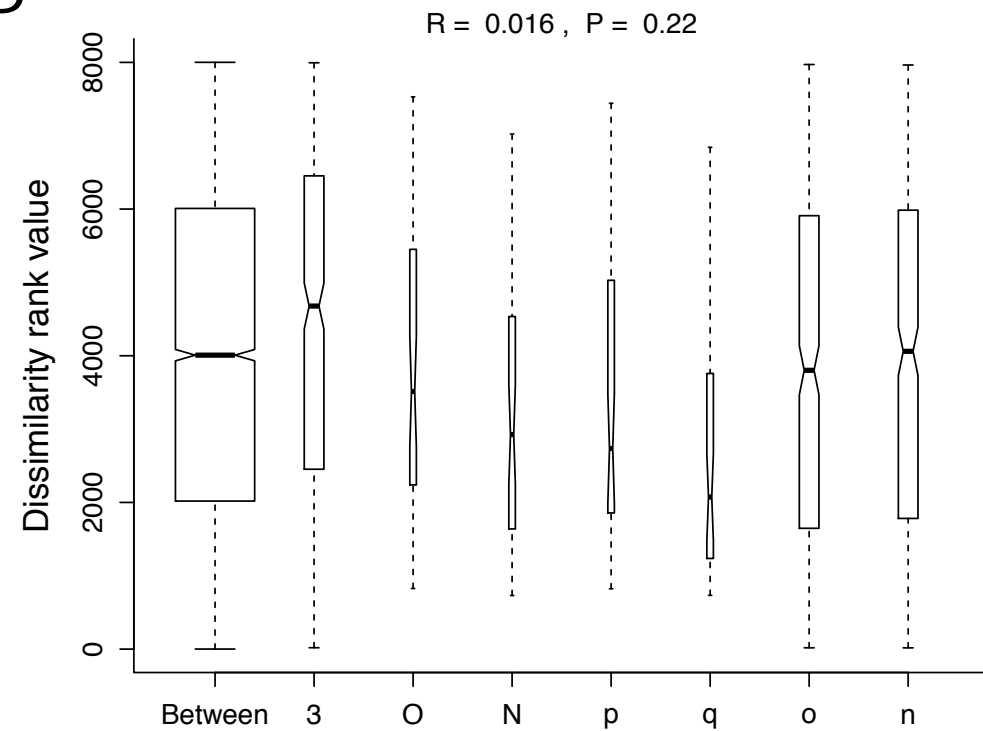

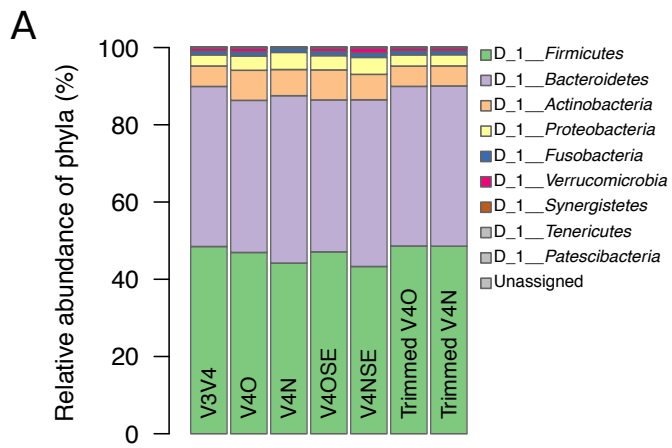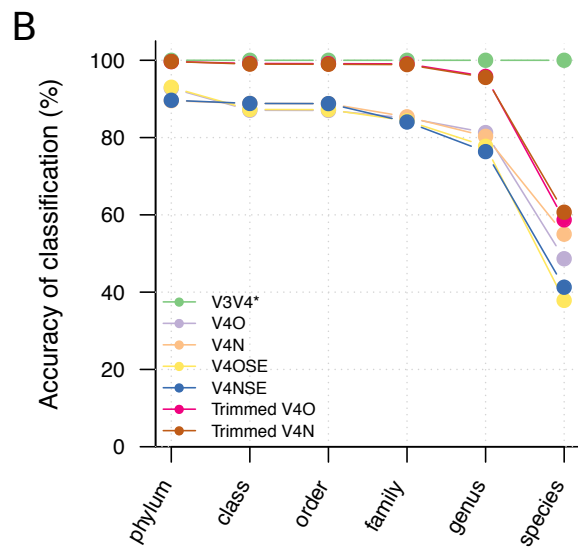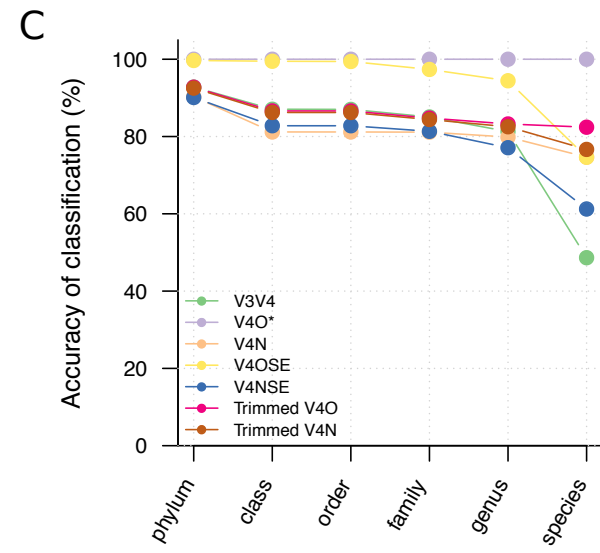

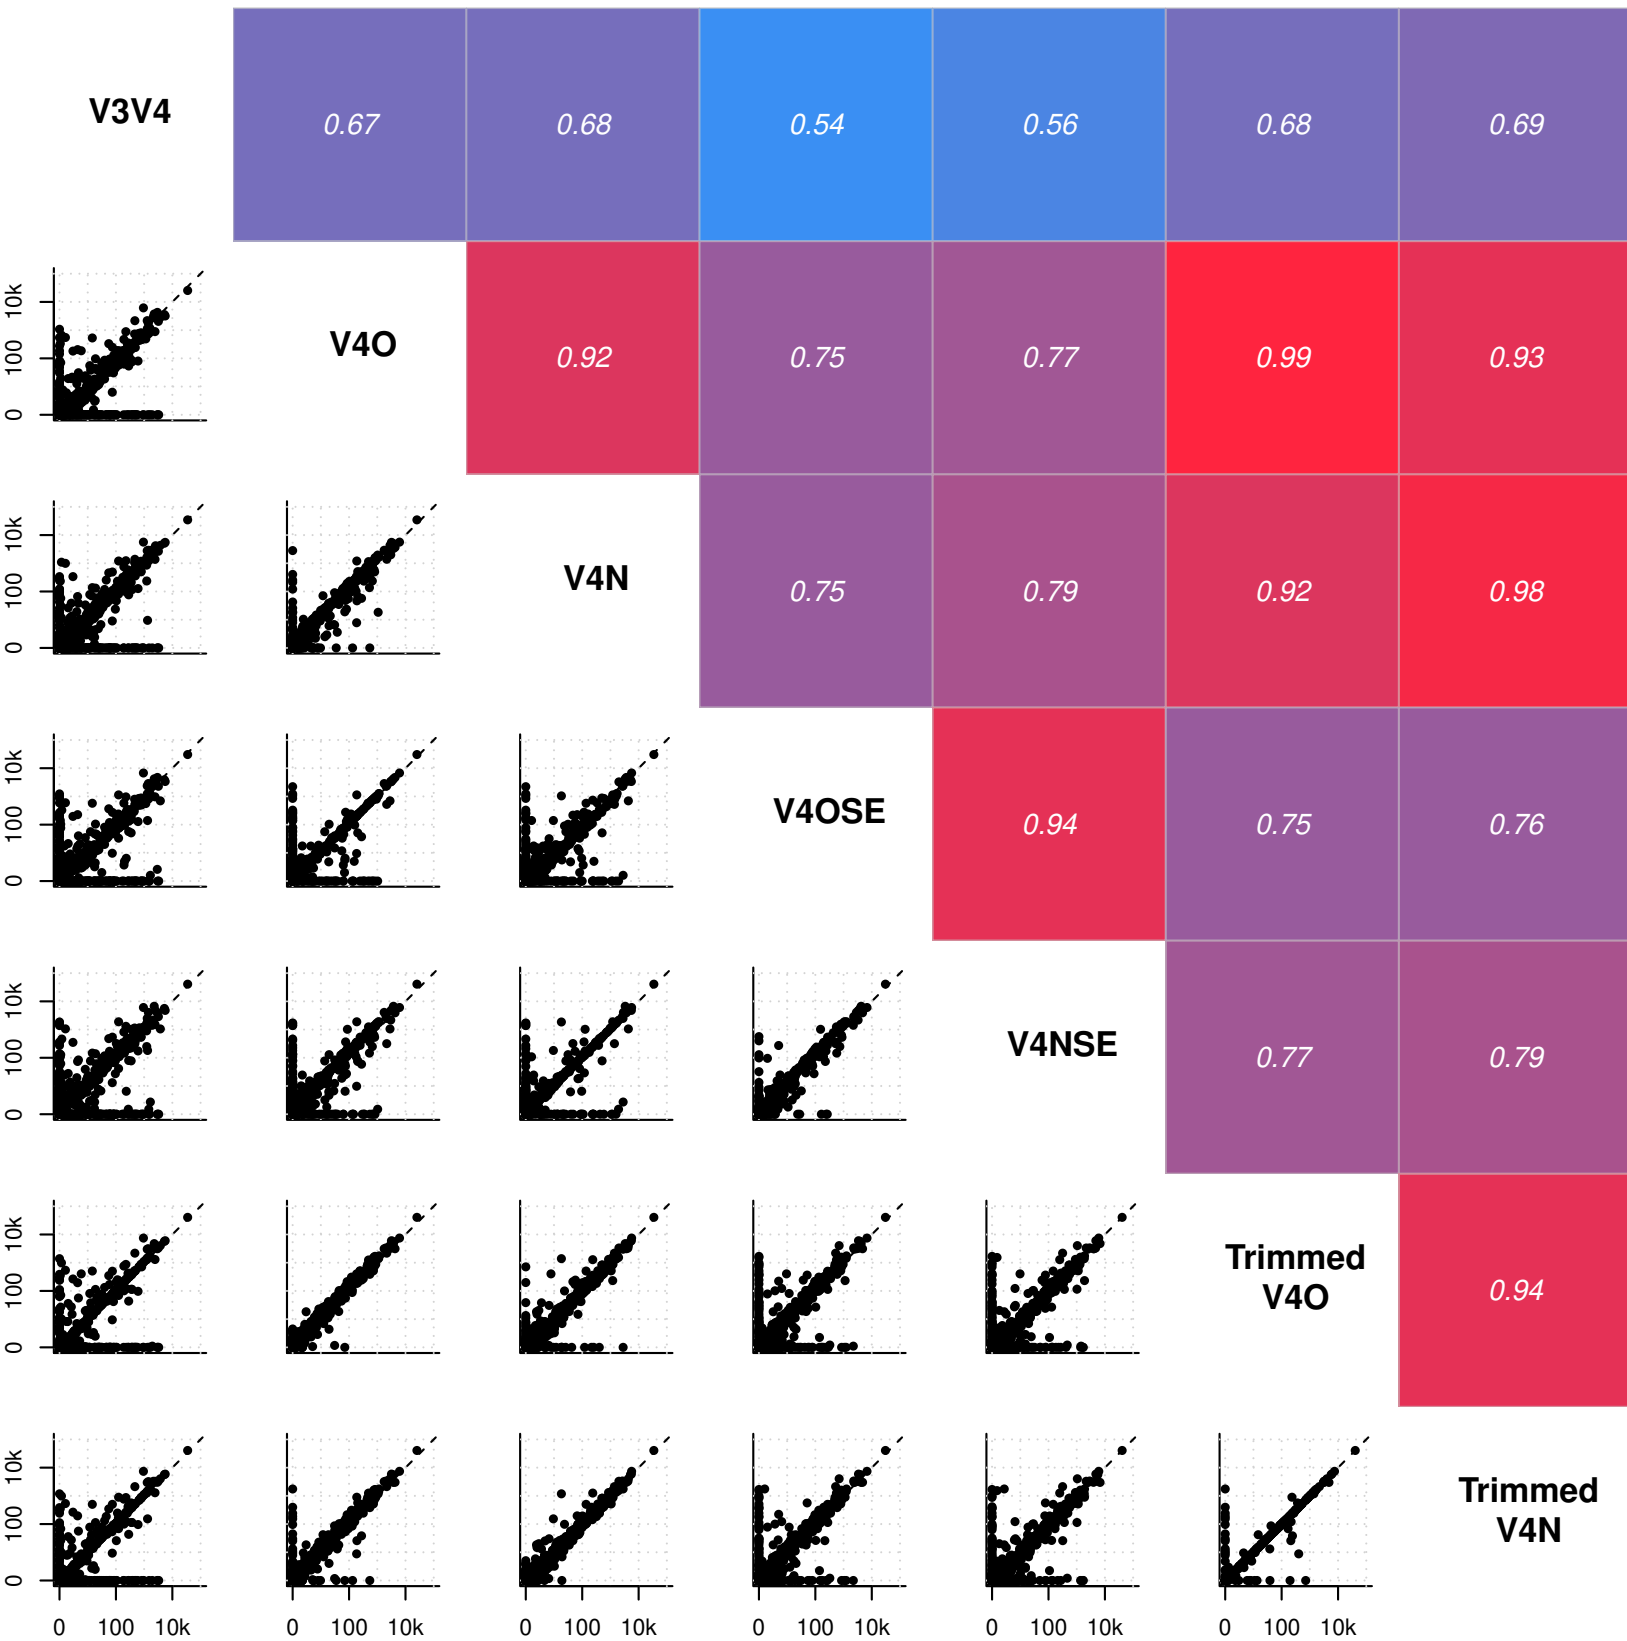

Source: https://biorxiv.org/content/10.1101/2020.08.18.256818v1.full.pdf
